# Supplementary material for: Exploring Mechanisms of Quantitative Resistance to Leptosphaeria maculans (Blackleg) in the Cotyledons of Canola (Brassica napus) Based on Transcriptomic and Microscopic Analyses
Source: PubMed Central journal article supplement (PMC7411684; doi:10.3390/plants9070864), 2020-07-08
Supplement: plants-09-00864-s001.pdf [file plants-09-00864-s001.pdf]

## Supplementary Information

A supplementary figure and 15 supplementary tables in this section contain details or data supplemental to the main figures and tables. They are crucial to understanding and reproducing the research shown, but explanation of the information may disrupt the flow of the main text.

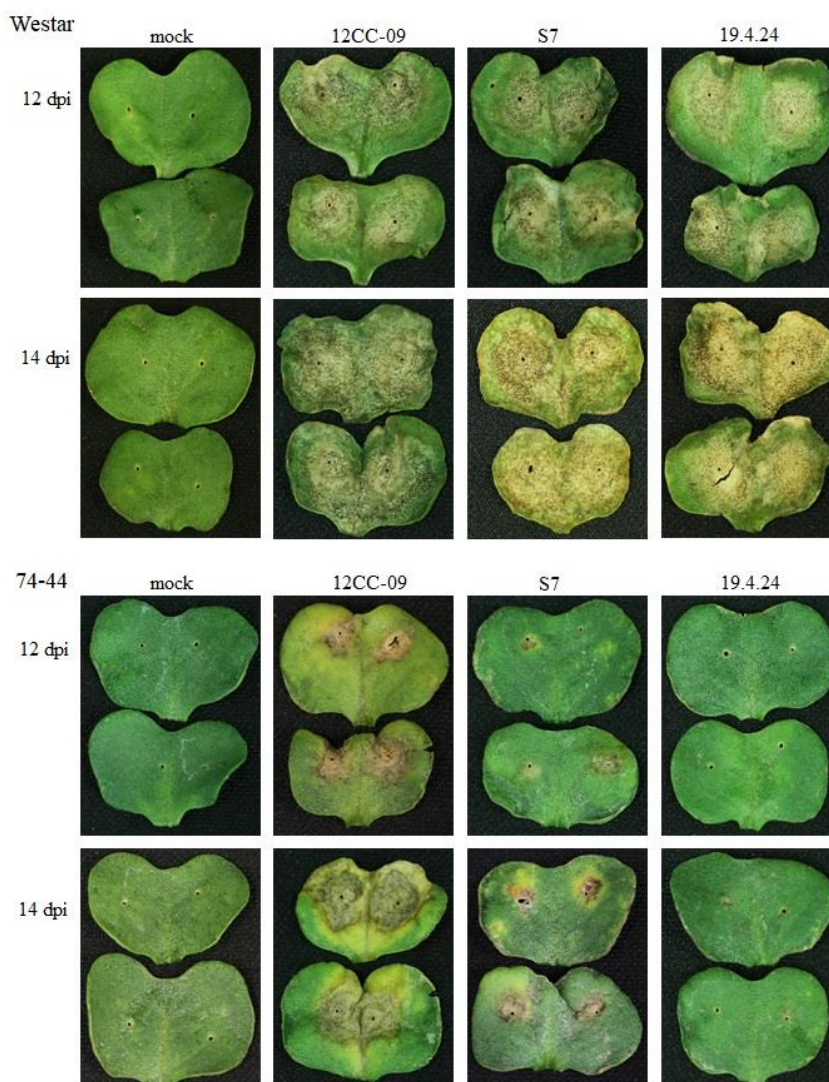

**Supplementary Figure S1.** Differential reaction of Westar and 74-44 BL cotyledons to inoculation with *L. maculans* isolates carrying *AvrLm1* (S7) or *AvrLm3* (19.4.24), or lacking *AvrLm1* and *AvrLm3* (12CC-09). These photos are used to illustrate the quantitative resistance (without the involvement of specific R genes) in the cotyledons of 74-44 BL; they were not part of disease severity assessment associated with any of the experiments reported in Results. The time-points (dpi) were chosen for optimal symptom expression, but might differ from those used in the reported experiments.

**Supplementary Table S1.** RNA-seq read mapping.

| Sample Name   | # Reads (pairs) | # Bases       | Avg. Quality | # Reads (paired and unpaired) aligned to <i>B. napus</i> genome |
|---------------|-----------------|---------------|--------------|-----------------------------------------------------------------|
| 74-44_Lm_Rep1 | 15,808,008      | 3,952,002,000 | 36           | 28,055,136                                                      |
| 74-44_Lm_Rep2 | 17,768,395      | 4,442,098,750 | 36           | 31,452,049                                                      |

|                  |            |               |    |            |
|------------------|------------|---------------|----|------------|
| 74-44_Lm_Rep3    | 15,476,667 | 3,869,166,750 | 36 | 25,210,609 |
| 74-44_Mock_Rep1  | 14,640,614 | 3,660,153,500 | 36 | 31,043,146 |
| 74-44_Mock_Rep2  | 14,746,856 | 3,686,714,000 | 36 | 31,050,813 |
| 74-44_Mock_Rep3  | 17,288,454 | 4,322,113,500 | 36 | 36,952,881 |
| Westar_Lm_Rep1   | 14,387,107 | 3,596,776,750 | 36 | 21,213,096 |
| Westar_Lm_Rep2   | 16,540,959 | 4,135,239,750 | 36 | 21,392,969 |
| Westar_Lm_Rep3   | 15,028,864 | 3,757,216,000 | 36 | 21,412,729 |
| Westar_Mock_Rep1 | 16,913,431 | 4,228,357,750 | 36 | 37,019,069 |
| Westar_Mock_Rep2 | 14,136,220 | 3,534,055,000 | 36 | 30,038,224 |
| Westar_Mock_Rep3 | 15,741,796 | 3,935,449,000 | 36 | 33,496,499 |

---

**Supplementary Table S2.** Genes of *Leptosphaeria maculans* that are more highly expressed in inoculated 74-44 BL than in inoculated Westar.

| Locus Tag      | Expression | log2 fold change | Adjusted p-value | Score         | Product                                                              | InterPro IDs           | Description                                                       |
|----------------|------------|------------------|------------------|---------------|----------------------------------------------------------------------|------------------------|-------------------------------------------------------------------|
| LEMA_P093320.1 | 40.32      | -2.10            | 8.28E-04         | -<br>2.61E+02 | similar to short chain dehydrogenase/reductase family oxidoreductase | IPR002347<br>IPR016040 | Short-chain dehydrogenase /reductase SDR<br>NAD(P)-binding domain |
| LEMA_P012380.1 | 12.05      | -2.04            | 6.76E-04         | -<br>7.81E+01 | hypothetical protein                                                 | IPR007817              | Pyoverdine biosynthesis                                           |
| LEMA_P055320.1 | 3.96       | -2.13            | 1.54E-04         | -<br>3.22E+01 | hypothetical protein                                                 | none                   |                                                                   |

**Table S3.** Genes of *Leptosphaeria maculans* that are more highly expressed in inoculated Westar than in inoculated 74-44 BL.

| Locus Tag          | Expression | log2 Fold Change | Adjusted p-value | Score    | Product                                     | InterPro IDs                        | Description                                                                                                             |
|--------------------|------------|------------------|------------------|----------|---------------------------------------------|-------------------------------------|-------------------------------------------------------------------------------------------------------------------------|
| LEMA_P11166<br>0.1 | 30.84      | 2.11             | 3.36E-03         | 1.61E+02 | predicted protein                           | none                                |                                                                                                                         |
| LEMA_P09860<br>0.1 | 7.34       | 2.24             | 1.16E-09         | 1.47E+02 | similar to 1,3,8-naphthalenetriol reductase | IPR002347<br>IPR016040<br>IPR020904 | Short-chain dehydrogenase/reductase SDR<br>NAD(P)-binding domain<br>Short-chain dehydrogenase/reductase, conserved site |
| LEMA_P12334<br>0.1 | 16.62      | 2.63             | 2.79E-03         | 1.12E+02 | similar to amine oxidase                    | IPR023753                           | FAD/NAD(P)-binding domain                                                                                               |
| LEMA_P08181<br>0.1 | 12.41      | 2.68             | 1.21E-02         | 6.36E+01 | similar to nonribosomal                     | IPR000873<br>IPR001242<br>IPR004045 | AMP-dependent synthetase/ligase<br>Condensation domain<br>Glutathione S-transferase, N-terminal                         |

|                    |      |      |          |          |                                                              |                                                                                         |                                                                                                                                                                                                                                                             |
|--------------------|------|------|----------|----------|--------------------------------------------------------------|-----------------------------------------------------------------------------------------|-------------------------------------------------------------------------------------------------------------------------------------------------------------------------------------------------------------------------------------------------------------|
|                    |      |      |          |          | peptide synthase<br>GliP                                     | IPR004046<br>IPR006162<br>IPR009081<br>IPR010071<br>IPR010987<br>IPR012336<br>IPR020845 | Glutathione S-transferase, C-terminal<br>Phosphopantetheine attachment site<br>Phosphopantetheine binding ACP domain<br>Amino acid adenylation domain<br>Glutathione S-transferase, C-terminal-like<br>Thioredoxin-like fold<br>AMP-binding, conserved site |
| LEMA_P07291<br>0.1 | 6.66 | 2.02 | 1.96E-03 | 3.65E+01 | hypothetical<br>protein                                      | IPR023210                                                                               | NADP-dependent oxidoreductase domain                                                                                                                                                                                                                        |
| LEMA_P10011<br>0.1 | 2.84 | 3.30 | 6.76E-04 | 2.97E+01 | hypothetical<br>protein                                      | IPR001209                                                                               | Ribosomal protein S14                                                                                                                                                                                                                                       |
| LEMA_P10308<br>0.1 | 7.17 | 2.63 | 3.49E-02 | 2.75E+01 | hypothetical<br>protein                                      | IPR008440<br>IPR018871                                                                  | Agglutinin-like protein repeat<br>GLEYA adhesin domain                                                                                                                                                                                                      |
| LEMA_P03204<br>0.1 | 3.21 | 2.39 | 3.32E-04 | 2.67E+01 | hypothetical<br>protein                                      | IPR009078                                                                               | Ferritin-like superfamily (IPR009078)                                                                                                                                                                                                                       |
| LEMA_P08173<br>0.1 | 4.72 | 2.31 | 4.36E-02 | 1.49E+01 | similar to<br>Methyltransferase<br>type 11                   |                                                                                         |                                                                                                                                                                                                                                                             |
| LEMA_P08180<br>0.1 | 3.09 | 3.13 | 4.36E-02 | 1.32E+01 | similar to<br>cytochrome P450                                | IPR001128<br>IPR002401<br>IPR017972                                                     | Cytochrome P450<br>Cytochrome P450, E-class, group I<br>Cytochrome P450, conserved site                                                                                                                                                                     |
| LEMA_P08172<br>0.1 | 1.93 | 2.90 | 3.55E-02 | 8.11E+00 | similar to aflatoxin<br>B1 aldehyde<br>reductase member<br>2 | IPR023210                                                                               | NADP-dependent oxidoreductase domain                                                                                                                                                                                                                        |
| LEMA_P01306<br>0.1 | 0.81 | 2.13 | 5.36E-03 | 3.93E+00 | hypothetical<br>protein                                      | none                                                                                    |                                                                                                                                                                                                                                                             |
| LEMA_P02669<br>0.1 | 0.71 | 2.73 | 4.47E-02 | 2.60E+00 | similar to FAD<br>binding domain<br>protein                  | none                                                                                    |                                                                                                                                                                                                                                                             |

**Supplementary Table S4.** Genes of *Brassica napus* that are more highly expressed in *Lm*-inoculated cotyledons of 74-44 BL than those of Westar (score  $\leq -2 \times 10^4$ ).

| Gene Name     | Expression                            | log2 Fold Change | Adjusted p-value | Score     | InterPro ID | Description                                                      |
|---------------|---------------------------------------|------------------|------------------|-----------|-------------|------------------------------------------------------------------|
| BnaA01g17570D | 2997.52                               | -3.41            | 2.35E-42         | -4.26E+05 | IPR000169   | Cysteine peptidase, cysteine active site                         |
|               |                                       |                  |                  |           | IPR000668   | Peptidase C1A, papain C-terminal                                 |
|               |                                       |                  |                  |           | IPR013128   | Peptidase C1A, papain                                            |
|               |                                       |                  |                  |           | IPR013201   | Proteinase inhibitor I29, cathepsin propeptide                   |
|               |                                       |                  |                  |           | IPR025661   | Cysteine peptidase, asparagine active site                       |
| BnaA01g04000D | 5722.37                               | -3.01            | 3.54E-11         | -1.80E+05 | IPR001096   | Peptidase C13, legumain                                          |
| BnaA09g52180D | 7220.10                               | -2.14            | 2.34E-08         | -1.18E+05 | IPR000668   | Peptidase C1A, papain C-terminal                                 |
|               |                                       |                  |                  |           | IPR012599   | Peptidase C1A, propeptide                                        |
|               |                                       |                  |                  |           | IPR013128   | Peptidase C1A, papain                                            |
|               |                                       |                  |                  |           | IPR015643   | Peptidase C1A, cathepsin B                                       |
|               |                                       |                  |                  |           | IPR025660   | Cysteine peptidase, histidine active site                        |
| BnaA07g20510D | 2050.02                               | -4.29            | 9.36E-12         | -9.70E+04 | IPR006814   | Photosystem II PsbR                                              |
| BnaC04g46560D | 18593.76                              | -2.05            | 5.95E-03         | -8.50E+04 | IPR003959   | ATPase, AAA-type, core                                           |
| BnaC04g10780D | 13062.01                              | -2.30            | 6.65E-03         | -6.53E+04 | IPR001344   | Chlorophyll A-B binding protein, plant                           |
|               |                                       |                  |                  |           | IPR022796   | Chlorophyll A-B binding protein                                  |
|               |                                       |                  |                  |           | IPR023329   | Chlorophyll a/b binding protein domain                           |
| BnaC02g00130D | 2502.42                               | -2.67            | 3.01E-09         | -5.69E+04 | IPR001461   | Peptidase A1                                                     |
|               |                                       |                  |                  |           | IPR001969   | Peptidase aspartic, active site                                  |
|               |                                       |                  |                  |           | IPR021109   | Aspartic peptidase                                               |
| BnaA04g04110D | 521.69                                | -2.56            | 3.25E-32         | -4.21E+04 | IPR004199   | Beta galactosidase small chain/ domain 5                         |
|               |                                       |                  |                  |           | IPR006101   | Glycoside hydrolase, family 2                                    |
|               |                                       |                  |                  |           | IPR006102   | Glycoside hydrolase, family 2, immunoglobulin-like beta-sandwich |
|               |                                       |                  |                  |           | IPR006103   | Glycoside hydrolase, family 2, TIM barrel                        |
|               |                                       |                  |                  |           | IPR006104   | Glycoside hydrolase, family 2, N-terminal                        |
|               |                                       |                  |                  |           | IPR008979   | Galactose-binding domain-like                                    |
|               |                                       |                  |                  |           | IPR011013   | Galactose mutarotase-like domain                                 |
| IPR013781     | Glycoside hydrolase, catalytic domain |                  |                  |           |             |                                                                  |

|               |         |       |          |           |           |                                                                            |
|---------------|---------|-------|----------|-----------|-----------|----------------------------------------------------------------------------|
|               |         |       |          |           | IPR013812 | Glycoside hydrolase, family 2/20, immunoglobulin-like beta-sandwich domain |
|               |         |       |          |           | IPR014718 | Glycoside hydrolase-type carbohydrate-binding, subgroup                    |
|               |         |       |          |           | IPR017853 | Glycoside hydrolase, superfamily                                           |
|               |         |       |          |           | IPR023230 | Glycoside hydrolase, family 2, conserved site                              |
|               |         |       |          |           | IPR023232 | Glycoside hydrolase, family 2, active site                                 |
| BnaA09g13710D | 5954.02 | -2.48 | 1.41E-03 | -4.21E+04 | IPR001344 | Chlorophyll A-B binding protein, plant                                     |
|               |         |       |          |           | IPR022796 | Chlorophyll A-B binding protein                                            |
|               |         |       |          |           | IPR023329 | Chlorophyll a/b binding protein domain                                     |
| BnaA05g29390D | 8516.26 | -2.06 | 4.03E-03 | -4.21E+04 | IPR001344 | Chlorophyll A-B binding protein, plant                                     |
|               |         |       |          |           | IPR022796 | Chlorophyll A-B binding protein                                            |
|               |         |       |          |           | IPR023329 | Chlorophyll a/b binding protein domain                                     |
| BnaA10g25820D | 518.97  | -2.95 | 1.64E-27 | -4.09E+04 | IPR004193 | Glycoside hydrolase, family 13, N-terminal                                 |
|               |         |       |          |           | IPR006047 | Glycosyl hydrolase, family 13, catalytic domain                            |
|               |         |       |          |           | IPR011839 | Alpha-1,6-glucosidases, pullulanase-type                                   |
|               |         |       |          |           | IPR013781 | Glycoside hydrolase, catalytic domain                                      |
|               |         |       |          |           | IPR013783 | Immunoglobulin-like fold                                                   |
|               |         |       |          |           | IPR014756 | Immunoglobulin E-set                                                       |
|               |         |       |          |           | IPR015902 | Glycoside hydrolase, family 13                                             |
|               |         |       |          |           | IPR017853 | Glycoside hydrolase, superfamily                                           |
|               |         |       |          |           | IPR024561 | Alpha-1,6-glucosidases, pullulanase-type, C-terminal                       |
| BnaA02g00670D | 2921.18 | -2.37 | 1.89E-06 | -3.96E+04 | IPR001461 | Peptidase A1                                                               |
|               |         |       |          |           | IPR001969 | Peptidase aspartic, active site                                            |
|               |         |       |          |           | IPR021109 | Aspartic peptidase                                                         |
| BnaA03g44930D | 603.62  | -2.32 | 1.79E-28 | -3.89E+04 | IPR002579 | Peptide methionine sulphoxide reductase MrsB                               |
|               |         |       |          |           | IPR011057 | Mss4-like                                                                  |
| BnaA10g26060D | 4072.11 | -2.42 | 2.31E-04 | -3.58E+04 | IPR000583 | Class II glutamine amidotransferase domain                                 |
|               |         |       |          |           | IPR002489 | Glutamate synthase, alpha subunit, C-terminal                              |
|               |         |       |          |           | IPR002932 | Glutamate synthase, central-C                                              |
|               |         |       |          |           | IPR006982 | Glutamate synthase, central-N                                              |
|               |         |       |          |           | IPR013785 | Aldolase-type TIM barrel                                                   |
|               |         |       |          |           | IPR017932 | Glutamine amidotransferase type 2 domain                                   |

|               |         |       |          |           |           |                                                                 |
|---------------|---------|-------|----------|-----------|-----------|-----------------------------------------------------------------|
| BnaA03g11710D | 2828.36 | -2.03 | 8.30E-07 | -3.49E+04 | IPR002922 | Thiazole biosynthetic enzyme Thi4 family                        |
|               |         |       |          |           | IPR001433 | Oxidoreductase FAD/NAD(P)-binding                               |
|               |         |       |          |           | IPR001709 | Flavoprotein pyridine nucleotide cytochrome reductase           |
|               |         |       |          |           | IPR008333 | Oxidoreductase, FAD-binding domain                              |
| BnaAnng14750D | 2232.72 | -2.28 | 2.74E-07 | -3.34E+04 | IPR012146 | Ferredoxin-NADP+ reductase                                      |
|               |         |       |          |           | IPR015701 | Ferredoxin Reductase                                            |
|               |         |       |          |           | IPR017927 | Ferredoxin reductase-type FAD-binding domain                    |
|               |         |       |          |           | IPR017938 | Riboflavin synthase-like beta-barrel                            |
| BnaA09g01080D | 5335.01 | -2.04 | 1.26E-03 | -3.16E+04 | IPR003685 | Photosystem I PsdD                                              |
|               |         |       |          |           | IPR001344 | Chlorophyll A-B binding protein, plant                          |
| BnaAnng00160D | 3182.66 | -2.73 | 3.39E-04 | -3.02E+04 | IPR022796 | Chlorophyll A-B binding protein                                 |
|               |         |       |          |           | IPR023329 | Chlorophyll a/b binding protein domain                          |
|               |         |       |          |           | IPR000894 | Ribulose biphosphate carboxylase small chain, domain            |
| BnaC04g30870D | 4634.79 | -2.49 | 2.70E-03 | -2.97E+04 | IPR024680 | Ribulose-1,5-bisphosphate carboxylase small subunit, N-terminal |
|               |         |       |          |           | IPR024681 | Ribulose biphosphate carboxylase, small chain                   |
|               |         |       |          |           | IPR002192 | Pyruvate phosphate dikinase, PEP/pyruvate-binding               |
| BnaC08g49610D | 1395.47 | -2.92 | 5.17E-08 | -2.97E+04 | IPR013815 | ATP-grasp fold, subdomain 1                                     |
|               |         |       |          |           | IPR013816 | ATP-grasp fold, subdomain 2                                     |
|               |         |       |          |           | IPR008797 | Photosystem II PsbQ, oxygen evolving complex                    |
| BnaA09g19870D | 4432.54 | -2.24 | 1.04E-03 | -2.96E+04 | IPR023222 | PsbQ-like domain                                                |
|               |         |       |          |           | IPR006652 | Kelch repeat type 1                                             |
| BnaAnng10080D | 2261.06 | -2.06 | 9.55E-07 | -2.80E+04 | IPR015915 | Kelch-type beta propeller                                       |
|               |         |       |          |           | IPR015916 | Galactose oxidase, beta-propeller                               |
| BnaA09g39860D | 1271.72 | -2.61 | 1.47E-08 | -2.60E+04 | IPR003823 | Domain of unknown function CP12                                 |
| BnaA07g12480D | 1364.05 | -3.41 | 2.88E-06 | -2.58E+04 | IPR002628 | Photosystem II PsbO, manganese-stabilising                      |
|               |         |       |          |           | IPR002683 | Photosystem II PsbP, oxygen evolving complex                    |
| BnaA10g04360D | 3681.08 | -2.21 | 1.02E-03 | -2.43E+04 | IPR016123 | Mog1/PsbP, alpha/beta/alpha sandwich                            |
|               |         |       |          |           | IPR001344 | Chlorophyll A-B binding protein, plant                          |
| BnaC03g59520D | 3386.56 | -2.66 | 3.90E-03 | -2.17E+04 | IPR022796 | Chlorophyll A-B binding protein                                 |
|               |         |       |          |           | IPR023329 | Chlorophyll a/b binding protein domain                          |
| BnaCnng24140D | 4609.48 | -2.20 | 7.27E-03 | -2.17E+04 | IPR001344 | Chlorophyll A-B binding protein, plant                          |

|               |         |       |          |           |           |                                                                       |
|---------------|---------|-------|----------|-----------|-----------|-----------------------------------------------------------------------|
|               |         |       |          |           | IPR022796 | Chlorophyll A-B binding protein                                       |
|               |         |       |          |           | IPR023329 | Chlorophyll a/b binding protein domain                                |
| BnaA05g30550D | 259.64  | -2.66 | 1.03E-31 | -2.14E+04 | IPR001650 | Helicase, C-terminal                                                  |
|               |         |       |          |           | IPR011545 | DNA/RNA helicase, DEAD/DEAH box type, N-terminal                      |
|               |         |       |          |           | IPR014001 | Helicase, superfamily 1/2, ATP-binding domain                         |
|               |         |       |          |           | IPR014014 | RNA helicase, DEAD-box type, Q motif                                  |
| BnaA08g17660D | 1196.77 | -3.79 | 3.06E-05 | -2.05E+04 | IPR001344 | Chlorophyll A-B binding protein, plant                                |
|               |         |       |          |           | IPR022796 | Chlorophyll A-B binding protein                                       |
|               |         |       |          |           | IPR023329 | Chlorophyll a/b binding protein domain                                |
| BnaC05g04590D | 2757.91 | -2.21 | 4.83E-04 | -2.02E+04 | IPR002683 | Photosystem II PsbP, oxygen evolving complex                          |
|               |         |       |          |           | IPR016123 | Mog1/PsbP, alpha/beta/alpha sandwich                                  |
| BnaC07g11970D | 354.31  | -2.29 | 1.82E-25 | -2.01E+04 | IPR010920 | Like-Sm (LSM) domain                                                  |
|               |         |       |          |           | IPR019050 | FDF domain                                                            |
|               |         |       |          |           | IPR025609 | Lsm14 N-terminal                                                      |
|               |         |       |          |           | IPR025761 | FF                                                                    |
|               |         |       |          |           | IPR025762 | DFDF domain                                                           |
|               |         |       |          |           | IPR025768 | TFG box                                                               |
| BnaA09g52250D | 1191.38 | -2.65 | 4.40E-07 | -2.01E+04 | IPR000719 | Protein kinase, catalytic domain                                      |
|               |         |       |          |           | IPR001245 | Serine-threonine/tyrosine-protein kinase catalytic domain             |
|               |         |       |          |           | IPR002290 | Serine/threonine- / dual specificity protein kinase, catalytic domain |
|               |         |       |          |           | IPR008271 | Serine/threonine-protein kinase, active site                          |
|               |         |       |          |           | IPR009856 | Light regulated Lir1                                                  |
|               |         |       |          |           | IPR011009 | Protein kinase-like domain                                            |
|               |         |       |          |           | IPR013320 | Concanavalin A-like lectin/glucanase, subgroup                        |
|               |         |       |          |           | IPR017441 | Protein kinase, ATP binding site                                      |
|               |         |       |          |           | IPR020635 | Tyrosine-protein kinase, catalytic domain                             |
| BnaC08g28700D | 920.92  | -2.83 | 2.03E-08 | -2.00E+04 | IPR001478 | PDZ domain                                                            |
|               |         |       |          |           | IPR004447 | C-terminal-processing peptidase S41A                                  |
|               |         |       |          |           | IPR005151 | Interphotoreceptor retinol-binding                                    |



**Supplementary Table S5.** Gene Ontology (GO) term enrichment of differentially expressed genes (DEGs) in *Brassica napus* that are more highly expressed in *Lm*-inoculated 74-44 BL than in inoculated Westar.

| GO ID      | GO Name                                                                            | GO Category    | FDR          | <i>p</i> -Value | % Test | % Reference |
|------------|------------------------------------------------------------------------------------|----------------|--------------|-----------------|--------|-------------|
| GO:0006364 | rRNA processing                                                                    | BIOL.<br>PROC. | 2.02E-<br>68 | 4.68E-<br>71    | 11.45% | 1.01%       |
| GO:0019344 | cysteine biosynthetic process                                                      | BIOL.<br>PROC. | 8.58E-<br>57 | 3.68E-<br>59    | 9.58%  | 0.85%       |
| GO:0009773 | photosynthetic electron transport in photosystem I                                 | BIOL.<br>PROC. | 1.79E-<br>54 | 9.05E-<br>57    | 5.51%  | 0.15%       |
| GO:0009637 | response to blue light                                                             | BIOL.<br>PROC. | 5.32E-<br>42 | 3.63E-<br>44    | 6.39%  | 0.46%       |
| GO:0010218 | response to far red light                                                          | BIOL.<br>PROC. | 4.06E-<br>41 | 2.91E-<br>43    | 5.73%  | 0.35%       |
| GO:0019288 | isopentenyl diphosphate biosynthetic process, methylerythritol 4-phosphate pathway | BIOL.<br>PROC. | 1.53E-<br>40 | 1.12E-<br>42    | 7.60%  | 0.80%       |
| GO:0010114 | response to red light                                                              | BIOL.<br>PROC. | 3.90E-<br>40 | 2.97E-<br>42    | 5.84%  | 0.39%       |
| GO:0009543 | chloroplast thylakoid lumen                                                        | CELL.<br>COMP. | 7.56E-<br>37 | 6.75E-<br>39    | 4.30%  | 0.17%       |
| GO:0035304 | regulation of protein dephosphorylation                                            | BIOL.<br>PROC. | 9.86E-<br>37 | 8.90E-<br>39    | 6.28%  | 0.56%       |
| GO:0016168 | chlorophyll binding                                                                | MOL.<br>FUNCT. | 1.12E-<br>36 | 1.02E-<br>38    | 3.74%  | 0.10%       |
| GO:0010287 | plastoglobule                                                                      | CELL.<br>COMP. | 7.15E-<br>30 | 8.03E-<br>32    | 3.85%  | 0.20%       |
| GO:0019252 | starch biosynthetic process                                                        | BIOL.<br>PROC. | 1.08E-<br>28 | 1.29E-<br>30    | 5.73%  | 0.66%       |
| GO:0018298 | protein-chromophore linkage                                                        | BIOL.<br>PROC. | 9.34E-<br>28 | 1.20E-<br>29    | 3.08%  | 0.11%       |

|            |                                           |                |              |              |       |       |
|------------|-------------------------------------------|----------------|--------------|--------------|-------|-------|
| GO:0010155 | regulation of proton transport            | BIOL.<br>PROC. | 1.88E-<br>27 | 2.44E-<br>29 | 4.07% | 0.28% |
| GO:0000023 | maltose metabolic process                 | BIOL.<br>PROC. | 3.97E-<br>25 | 5.51E-<br>27 | 4.63% | 0.47% |
| GO:0010103 | stomatal complex morphogenesis            | BIOL.<br>PROC. | 1.36E-<br>24 | 1.95E-<br>26 | 4.74% | 0.51% |
| GO:0048046 | apoplast                                  | CELL.<br>COMP. | 1.97E-<br>24 | 2.87E-<br>26 | 8.15% | 1.77% |
| GO:0010027 | thylakoid membrane organization           | BIOL.<br>PROC. | 3.57E-<br>22 | 5.51E-<br>24 | 4.85% | 0.63% |
| GO:0009654 | photosystem II oxygen evolving<br>complex | CELL.<br>COMP. | 6.75E-<br>21 | 1.10E-<br>22 | 2.09% | 0.05% |
| GO:0015995 | chlorophyll biosynthetic process          | BIOL.<br>PROC. | 1.82E-<br>20 | 3.02E-<br>22 | 4.19% | 0.50% |
| GO:0008266 | poly(U) RNA binding                       | MOL.<br>FUNCT. | 8.93E-<br>18 | 1.66E-<br>19 | 1.98% | 0.07% |
| GO:0009902 | chloroplast relocation                    | BIOL.<br>PROC. | 3.27E-<br>14 | 7.42E-<br>16 | 2.86% | 0.33% |
| GO:0070838 | divalent metal ion transport              | BIOL.<br>PROC. | 1.79E-<br>13 | 4.26E-<br>15 | 4.85% | 1.13% |
| GO:0009735 | response to cytokinin                     | BIOL.<br>PROC. | 2.64E-<br>13 | 6.41E-<br>15 | 4.74% | 1.09% |
| GO:0009744 | response to sucrose                       | BIOL.<br>PROC. | 8.31E-<br>13 | 2.07E-<br>14 | 4.07% | 0.84% |
| GO:0043085 | positive regulation of catalytic activity | BIOL.<br>PROC. | 4.28E-<br>12 | 1.14E-<br>13 | 3.85% | 0.80% |
| GO:0009644 | response to high light intensity          | BIOL.<br>PROC. | 1.23E-<br>11 | 3.34E-<br>13 | 3.85% | 0.83% |
| GO:0016556 | mRNA modification                         | BIOL.<br>PROC. | 1.98E-<br>11 | 5.45E-<br>13 | 2.42% | 0.31% |
| GO:0009538 | photosystem I reaction center             | CELL.<br>COMP. | 2.43E-<br>11 | 6.73E-<br>13 | 1.10% | 0.03% |

|            |                                                                            |                |              |              |       |       |
|------------|----------------------------------------------------------------------------|----------------|--------------|--------------|-------|-------|
| GO:0019761 | glucosinolate biosynthetic process                                         | BIOL.<br>PROC. | 5.61E-<br>11 | 1.60E-<br>12 | 3.41% | 0.69% |
| GO:0009768 | photosynthesis, light harvesting in<br>photosystem I                       | BIOL.<br>PROC. | 5.82E-<br>11 | 1.67E-<br>12 | 0.88% | 0.01% |
| GO:0009965 | leaf morphogenesis                                                         | BIOL.<br>PROC. | 8.63E-<br>11 | 2.50E-<br>12 | 3.74% | 0.84% |
| GO:0010310 | regulation of hydrogen peroxide<br>metabolic process                       | BIOL.<br>PROC. | 8.68E-<br>11 | 2.52E-<br>12 | 3.41% | 0.70% |
| GO:0009595 | detection of biotic stimulus                                               | BIOL.<br>PROC. | 1.07E-<br>10 | 3.13E-<br>12 | 2.75% | 0.45% |
| GO:0009409 | response to cold                                                           | BIOL.<br>PROC. | 1.20E-<br>10 | 3.54E-<br>12 | 6.72% | 2.42% |
| GO:0042742 | defense response to bacterium                                              | BIOL.<br>PROC. | 4.60E-<br>10 | 1.38E-<br>11 | 5.62% | 1.86% |
| GO:0045893 | positive regulation of transcription,<br>DNA-templated                     | BIOL.<br>PROC. | 7.56E-<br>10 | 2.31E-<br>11 | 5.29% | 1.71% |
| GO:0030093 | chloroplast photosystem I                                                  | CELL.<br>COMP. | 1.35E-<br>09 | 4.25E-<br>11 | 0.66% | 0.00% |
| GO:0010598 | NAD(P)H dehydrogenase complex<br>(plastoquinone)                           | CELL.<br>COMP. | 1.92E-<br>09 | 6.12E-<br>11 | 0.99% | 0.03% |
| GO:0000165 | MAPK cascade                                                               | BIOL.<br>PROC. | 3.02E-<br>09 | 9.72E-<br>11 | 3.85% | 1.03% |
| GO:0016117 | carotenoid biosynthetic process                                            | BIOL.<br>PROC. | 4.30E-<br>09 | 1.40E-<br>10 | 2.53% | 0.46% |
| GO:0009862 | systemic acquired resistance, salicylic<br>acid mediated signaling pathway | BIOL.<br>PROC. | 4.89E-<br>09 | 1.60E-<br>10 | 3.74% | 0.99% |
| GO:0006636 | unsaturated fatty acid biosynthetic<br>process                             | BIOL.<br>PROC. | 7.19E-<br>09 | 2.38E-<br>10 | 2.09% | 0.31% |
| GO:0042793 | plastid transcription                                                      | BIOL.<br>PROC. | 1.36E-<br>08 | 4.59E-<br>10 | 1.76% | 0.21% |
| GO:0019843 | rRNA binding                                                               | MOL.<br>FUNCT. | 2.36E-<br>08 | 8.12E-<br>10 | 2.09% | 0.33% |

|            |                                                  |                |              |              |       |       |
|------------|--------------------------------------------------|----------------|--------------|--------------|-------|-------|
| GO:0031348 | negative regulation of defense response          | BIOL.<br>PROC. | 3.18E-<br>08 | 1.10E-<br>09 | 3.96% | 1.19% |
| GO:0004565 | beta-galactosidase activity                      | MOL.<br>FUNCT. | 3.28E-<br>08 | 1.14E-<br>09 | 1.21% | 0.08% |
| GO:0009697 | salicylic acid biosynthetic process              | BIOL.<br>PROC. | 6.73E-<br>08 | 2.41E-<br>09 | 3.19% | 0.83% |
| GO:0010319 | stromule                                         | CELL.<br>COMP. | 7.34E-<br>08 | 2.65E-<br>09 | 1.54% | 0.18% |
| GO:0003959 | NADPH dehydrogenase activity                     | MOL.<br>FUNCT. | 1.63E-<br>07 | 6.08E-<br>09 | 0.77% | 0.02% |
| GO:0009867 | jasmonic acid mediated signaling pathway         | BIOL.<br>PROC. | 3.78E-<br>07 | 1.45E-<br>08 | 3.74% | 1.20% |
| GO:0019898 | extrinsic component of membrane                  | CELL.<br>COMP. | 6.14E-<br>07 | 2.41E-<br>08 | 2.09% | 0.41% |
| GO:0009780 | photosynthetic NADP+ reduction                   | BIOL.<br>PROC. | 2.39E-<br>06 | 9.58E-<br>08 | 0.44% | 0.00% |
| GO:0006655 | phosphatidylglycerol biosynthetic process        | BIOL.<br>PROC. | 3.26E-<br>06 | 1.31E-<br>07 | 1.54% | 0.24% |
| GO:0010196 | nonphotochemical quenching                       | BIOL.<br>PROC. | 4.07E-<br>06 | 1.65E-<br>07 | 0.66% | 0.02% |
| GO:0031969 | chloroplast membrane                             | CELL.<br>COMP. | 4.09E-<br>06 | 1.66E-<br>07 | 2.64% | 0.73% |
| GO:0016226 | iron-sulfur cluster assembly                     | BIOL.<br>PROC. | 9.42E-<br>06 | 3.95E-<br>07 | 1.76% | 0.36% |
| GO:0010363 | regulation of plant-type hypersensitive response | BIOL.<br>PROC. | 1.77E-<br>05 | 7.54E-<br>07 | 3.96% | 1.56% |
| GO:0006612 | protein targeting to membrane                    | BIOL.<br>PROC. | 2.48E-<br>05 | 1.07E-<br>06 | 4.19% | 1.71% |
| GO:0042550 | photosystem I stabilization                      | BIOL.<br>PROC. | 3.00E-<br>05 | 1.30E-<br>06 | 0.44% | 0.01% |

|            |                                                                             |             |          |          |       |       |
|------------|-----------------------------------------------------------------------------|-------------|----------|----------|-------|-------|
| GO:0047100 | glyceraldehyde-3-phosphate dehydrogenase (NADP+) (phosphorylating) activity | MOL. FUNCT. | 3.00E-05 | 1.30E-06 | 0.44% | 0.01% |
| GO:0042549 | photosystem II stabilization                                                | BIOL. PROC. | 3.09E-05 | 1.34E-06 | 0.55% | 0.02% |
| GO:0005762 | mitochondrial large ribosomal subunit                                       | CELL. COMP. | 3.21E-05 | 1.41E-06 | 0.88% | 0.08% |
| GO:0042335 | cuticle development                                                         | BIOL. PROC. | 5.20E-05 | 2.31E-06 | 1.21% | 0.19% |
| GO:0032544 | plastid translation                                                         | BIOL. PROC. | 5.35E-05 | 2.38E-06 | 0.66% | 0.04% |
| GO:0018316 | peptide cross-linking via L-cystine                                         | BIOL. PROC. | 6.38E-05 | 2.87E-06 | 0.33% | 0.00% |
| GO:0009783 | photosystem II antenna complex                                              | CELL. COMP. | 6.67E-05 | 3.03E-06 | 0.44% | 0.01% |
| GO:0030246 | carbohydrate binding                                                        | MOL. FUNCT. | 7.67E-05 | 3.51E-06 | 3.08% | 1.13% |
| GO:0003735 | structural constituent of ribosome                                          | MOL. FUNCT. | 8.24E-05 | 3.80E-06 | 3.85% | 1.60% |
| GO:0009106 | lipoate metabolic process                                                   | BIOL. PROC. | 1.11E-04 | 5.19E-06 | 1.10% | 0.17% |
| GO:0016984 | ribulose-bisphosphate carboxylase activity                                  | MOL. FUNCT. | 1.22E-04 | 5.76E-06 | 0.55% | 0.02% |
| GO:0000038 | very long-chain fatty acid metabolic process                                | BIOL. PROC. | 1.37E-04 | 6.58E-06 | 1.21% | 0.21% |
| GO:0006546 | glycine catabolic process                                                   | BIOL. PROC. | 1.42E-04 | 6.86E-06 | 1.21% | 0.21% |
| GO:0009782 | photosystem I antenna complex                                               | CELL. COMP. | 1.48E-04 | 7.14E-06 | 0.33% | 0.00% |
| GO:0009108 | coenzyme biosynthetic process                                               | BIOL. PROC. | 1.59E-04 | 7.69E-06 | 2.31% | 0.74% |

|            |                                           |                |              |              |       |       |
|------------|-------------------------------------------|----------------|--------------|--------------|-------|-------|
| GO:0071454 | cellular response to anoxia               | BIOL.<br>PROC. | 2.85E-<br>04 | 1.42E-<br>05 | 0.33% | 0.00% |
| GO:0050661 | NADP binding                              | MOL.<br>FUNCT. | 3.70E-<br>04 | 1.85E-<br>05 | 1.21% | 0.24% |
| GO:0009505 | plant-type cell wall                      | CELL.<br>COMP. | 5.17E-<br>04 | 2.62E-<br>05 | 2.75% | 1.06% |
| GO:0006005 | L-fucose biosynthetic process             | BIOL.<br>PROC. | 7.55E-<br>04 | 3.92E-<br>05 | 0.33% | 0.00% |
| GO:0050832 | defense response to fungus                | BIOL.<br>PROC. | 7.64E-<br>04 | 3.97E-<br>05 | 3.85% | 1.78% |
| GO:0042744 | hydrogen peroxide catabolic process       | BIOL.<br>PROC. | 8.28E-<br>04 | 4.34E-<br>05 | 1.87% | 0.58% |
| GO:0005528 | FK506 binding                             | MOL.<br>FUNCT. | 9.23E-<br>04 | 4.89E-<br>05 | 0.66% | 0.07% |
| GO:0005247 | voltage-gated chloride channel activity   | MOL.<br>FUNCT. | 9.41E-<br>04 | 5.01E-<br>05 | 0.44% | 0.02% |
| GO:0009533 | chloroplast stromal thylakoid             | CELL.<br>COMP. | 1.11E-<br>03 | 5.97E-<br>05 | 0.44% | 0.02% |
| GO:0090042 | tubulin deacetylation                     | BIOL.<br>PROC. | 1.45E-<br>03 | 8.07E-<br>05 | 0.22% | 0.00% |
| GO:0051721 | protein phosphatase 2A binding            | MOL.<br>FUNCT. | 1.45E-<br>03 | 8.07E-<br>05 | 0.22% | 0.00% |
| GO:0042903 | tubulin deacetylase activity              | MOL.<br>FUNCT. | 1.45E-<br>03 | 8.07E-<br>05 | 0.22% | 0.00% |
| GO:0043014 | alpha-tubulin binding                     | MOL.<br>FUNCT. | 1.45E-<br>03 | 8.07E-<br>05 | 0.22% | 0.00% |
| GO:0034707 | chloride channel complex                  | CELL.<br>COMP. | 1.49E-<br>03 | 8.27E-<br>05 | 0.44% | 0.02% |
| GO:0010242 | oxygen evolving activity                  | MOL.<br>FUNCT. | 1.49E-<br>03 | 8.28E-<br>05 | 0.33% | 0.01% |
| GO:0043086 | negative regulation of catalytic activity | BIOL.<br>PROC. | 1.58E-<br>03 | 8.82E-<br>05 | 2.31% | 0.88% |

|            |                                                          |                |              |              |       |       |
|------------|----------------------------------------------------------|----------------|--------------|--------------|-------|-------|
| GO:0031012 | extracellular matrix                                     | CELL.<br>COMP. | 1.73E-<br>03 | 9.75E-<br>05 | 0.77% | 0.11% |
| GO:0006833 | water transport                                          | BIOL.<br>PROC. | 1.80E-<br>03 | 1.03E-<br>04 | 1.98% | 0.69% |
| GO:0000413 | protein peptidyl-prolyl isomerization                    | BIOL.<br>PROC. | 1.91E-<br>03 | 1.09E-<br>04 | 0.99% | 0.19% |
| GO:0003755 | peptidyl-prolyl cis-trans isomerase activity             | MOL.<br>FUNCT. | 1.91E-<br>03 | 1.09E-<br>04 | 0.99% | 0.19% |
| GO:0009508 | plastid chromosome                                       | CELL.<br>COMP. | 2.02E-<br>03 | 1.16E-<br>04 | 0.55% | 0.05% |
| GO:1902476 | chloride transmembrane transport                         | BIOL.<br>PROC. | 2.22E-<br>03 | 1.29E-<br>04 | 0.44% | 0.02% |
| GO:0080153 | negative regulation of reductive pentose-phosphate cycle | BIOL.<br>PROC. | 2.55E-<br>03 | 1.50E-<br>04 | 0.33% | 0.01% |
| GO:0050577 | GDP-L-fucose synthase activity                           | MOL.<br>FUNCT. | 2.55E-<br>03 | 1.50E-<br>04 | 0.33% | 0.01% |
| GO:0015996 | chlorophyll catabolic process                            | BIOL.<br>PROC. | 2.57E-<br>03 | 1.51E-<br>04 | 0.99% | 0.20% |
| GO:0009737 | response to abscisic acid                                | BIOL.<br>PROC. | 2.75E-<br>03 | 1.62E-<br>04 | 5.07% | 2.79% |
| GO:0050821 | protein stabilization                                    | BIOL.<br>PROC. | 2.84E-<br>03 | 1.68E-<br>04 | 0.44% | 0.03% |
| GO:0045036 | protein targeting to chloroplast                         | BIOL.<br>PROC. | 3.14E-<br>03 | 1.88E-<br>04 | 1.10% | 0.26% |
| GO:0004040 | amidase activity                                         | MOL.<br>FUNCT. | 3.22E-<br>03 | 1.93E-<br>04 | 0.33% | 0.01% |
| GO:0045454 | cell redox homeostasis                                   | BIOL.<br>PROC. | 3.37E-<br>03 | 2.03E-<br>04 | 1.65% | 0.54% |
| GO:0042631 | cellular response to water deprivation                   | BIOL.<br>PROC. | 3.49E-<br>03 | 2.12E-<br>04 | 1.21% | 0.31% |
| GO:0005509 | calcium ion binding                                      | MOL.<br>FUNCT. | 3.49E-<br>03 | 2.11E-<br>04 | 2.53% | 1.05% |

|            |                                                                                                                                                                      |                |          |          |       |       |
|------------|----------------------------------------------------------------------------------------------------------------------------------------------------------------------|----------------|----------|----------|-------|-------|
| GO:0043481 | anthocyanin accumulation in tissues in response to UV light                                                                                                          | BIOL.<br>PROC. | 3.83E-03 | 2.35E-04 | 1.54% | 0.49% |
| GO:0010189 | vitamin E biosynthetic process                                                                                                                                       | BIOL.<br>PROC. | 3.89E-03 | 2.42E-04 | 0.44% | 0.03% |
| GO:0043864 | indoleacetamide hydrolase activity                                                                                                                                   | MOL.<br>FUNCT. | 3.89E-03 | 2.41E-04 | 0.22% | 0.00% |
| GO:0031679 | NADH dehydrogenase (plastoquinone) activity                                                                                                                          | MOL.<br>FUNCT. | 3.89E-03 | 2.41E-04 | 0.22% | 0.00% |
| GO:0004857 | enzyme inhibitor activity                                                                                                                                            | MOL.<br>FUNCT. | 4.22E-03 | 2.66E-04 | 1.98% | 0.75% |
| GO:0015250 | water channel activity                                                                                                                                               | MOL.<br>FUNCT. | 4.65E-03 | 2.96E-04 | 0.77% | 0.13% |
| GO:0010019 | chloroplast-nucleus signaling pathway                                                                                                                                | BIOL.<br>PROC. | 4.74E-03 | 3.04E-04 | 0.44% | 0.03% |
| GO:0080170 | hydrogen peroxide transmembrane transport                                                                                                                            | BIOL.<br>PROC. | 4.74E-03 | 3.04E-04 | 0.33% | 0.01% |
| GO:0016151 | nickel cation binding                                                                                                                                                | MOL.<br>FUNCT. | 4.74E-03 | 3.04E-04 | 0.33% | 0.01% |
| GO:0016709 | oxidoreductase activity, acting on paired donors, with incorporation or reduction of molecular oxygen, NAD(P)H as one donor, and incorporation of one atom of oxygen | MOL.<br>FUNCT. | 5.04E-03 | 3.23E-04 | 1.10% | 0.28% |
| GO:0045735 | nutrient reservoir activity                                                                                                                                          | MOL.<br>FUNCT. | 5.72E-03 | 3.69E-04 | 0.88% | 0.18% |
| GO:0000311 | plastid large ribosomal subunit                                                                                                                                      | CELL.<br>COMP. | 5.79E-03 | 3.75E-04 | 0.44% | 0.03% |
| GO:0030091 | protein repair                                                                                                                                                       | BIOL.<br>PROC. | 5.83E-03 | 3.79E-04 | 0.55% | 0.06% |
| GO:0009269 | response to desiccation                                                                                                                                              | BIOL.<br>PROC. | 6.09E-03 | 3.97E-04 | 0.77% | 0.14% |



|            |                                                                                          |                |              |              |       |       |
|------------|------------------------------------------------------------------------------------------|----------------|--------------|--------------|-------|-------|
| GO:0097339 | glycolate transmembrane transport                                                        | BIOL.<br>PROC. | 7.20E-<br>03 | 4.78E-<br>04 | 0.22% | 0.00% |
| GO:1901975 | glycerate transmembrane transport                                                        | BIOL.<br>PROC. | 7.20E-<br>03 | 4.78E-<br>04 | 0.22% | 0.00% |
| GO:0043879 | glycolate transmembrane transporter<br>activity                                          | MOL.<br>FUNCT. | 7.20E-<br>03 | 4.78E-<br>04 | 0.22% | 0.00% |
| GO:0008531 | riboflavin kinase activity                                                               | MOL.<br>FUNCT. | 7.20E-<br>03 | 4.78E-<br>04 | 0.22% | 0.00% |
| GO:0009671 | nitrate:proton symporter activity                                                        | MOL.<br>FUNCT. | 7.20E-<br>03 | 4.78E-<br>04 | 0.22% | 0.00% |
| GO:0010301 | xanthoxin dehydrogenase activity                                                         | MOL.<br>FUNCT. | 7.20E-<br>03 | 4.78E-<br>04 | 0.22% | 0.00% |
| GO:0045550 | geranylgeranyl reductase activity                                                        | MOL.<br>FUNCT. | 7.20E-<br>03 | 4.78E-<br>04 | 0.22% | 0.00% |
| GO:1901974 | glycerate transmembrane transporter<br>activity                                          | MOL.<br>FUNCT. | 7.20E-<br>03 | 4.78E-<br>04 | 0.22% | 0.00% |
| GO:0006354 | DNA-templated transcription,<br>elongation                                               | BIOL.<br>PROC. | 7.33E-<br>03 | 4.88E-<br>04 | 1.21% | 0.35% |
| GO:0009772 | photosynthetic electron transport in<br>photosystem II                                   | BIOL.<br>PROC. | 7.55E-<br>03 | 5.04E-<br>04 | 0.44% | 0.04% |
| GO:0003958 | NADPH-hemoprotein reductase activity                                                     | MOL.<br>FUNCT. | 7.55E-<br>03 | 5.04E-<br>04 | 0.44% | 0.04% |
| GO:0010118 | stomatal movement                                                                        | BIOL.<br>PROC. | 9.18E-<br>03 | 6.17E-<br>04 | 1.43% | 0.48% |
| GO:0015035 | protein disulfide oxidoreductase activity                                                | MOL.<br>FUNCT. | 9.39E-<br>03 | 6.33E-<br>04 | 1.10% | 0.30% |
| GO:0009695 | jasmonic acid biosynthetic process                                                       | BIOL.<br>PROC. | 1.03E-<br>02 | 7.00E-<br>04 | 1.54% | 0.55% |
| GO:0016671 | oxidoreductase activity, acting on a<br>sulfur group of donors, disulfide as<br>acceptor | MOL.<br>FUNCT. | 1.12E-<br>02 | 7.61E-<br>04 | 0.66% | 0.11% |

|            |                                                                                             |                |              |              |       |       |
|------------|---------------------------------------------------------------------------------------------|----------------|--------------|--------------|-------|-------|
| GO:0071277 | cellular response to calcium ion                                                            | BIOL.<br>PROC. | 1.15E-<br>02 | 7.92E-<br>04 | 0.22% | 0.00% |
| GO:0050278 | sedoheptulose-bisphosphatase activity                                                       | MOL.<br>FUNCT. | 1.15E-<br>02 | 7.92E-<br>04 | 0.22% | 0.00% |
| GO:0008974 | phosphoribulokinase activity                                                                | MOL.<br>FUNCT. | 1.15E-<br>02 | 7.92E-<br>04 | 0.22% | 0.00% |
| GO:0008465 | glycerate dehydrogenase activity                                                            | MOL.<br>FUNCT. | 1.15E-<br>02 | 7.92E-<br>04 | 0.22% | 0.00% |
| GO:0046406 | magnesium protoporphyrin IX<br>methyltransferase activity                                   | MOL.<br>FUNCT. | 1.15E-<br>02 | 7.92E-<br>04 | 0.22% | 0.00% |
| GO:0052689 | carboxylic ester hydrolase activity                                                         | MOL.<br>FUNCT. | 1.22E-<br>02 | 8.44E-<br>04 | 2.53% | 1.16% |
| GO:0055070 | copper ion homeostasis                                                                      | BIOL.<br>PROC. | 1.23E-<br>02 | 8.50E-<br>04 | 0.44% | 0.04% |
| GO:0042351 | 'de novo' GDP-L-fucose biosynthetic<br>process                                              | BIOL.<br>PROC. | 1.23E-<br>02 | 8.53E-<br>04 | 0.33% | 0.02% |
| GO:0009051 | pentose-phosphate shunt, oxidative<br>branch                                                | BIOL.<br>PROC. | 1.23E-<br>02 | 8.53E-<br>04 | 0.33% | 0.02% |
| GO:0051537 | 2 iron, 2 sulfur cluster binding                                                            | MOL.<br>FUNCT. | 1.23E-<br>02 | 8.53E-<br>04 | 0.88% | 0.21% |
| GO:0031408 | oxylipin biosynthetic process                                                               | BIOL.<br>PROC. | 1.25E-<br>02 | 8.76E-<br>04 | 0.77% | 0.16% |
| GO:0016628 | oxidoreductase activity, acting on the<br>CH-CH group of donors, NAD or<br>NADP as acceptor | MOL.<br>FUNCT. | 1.38E-<br>02 | 9.72E-<br>04 | 0.77% | 0.16% |
| GO:0004345 | glucose-6-phosphate dehydrogenase<br>activity                                               | MOL.<br>FUNCT. | 1.39E-<br>02 | 9.81E-<br>04 | 0.33% | 0.02% |
| GO:0050162 | oxalate oxidase activity                                                                    | MOL.<br>FUNCT. | 1.39E-<br>02 | 9.81E-<br>04 | 0.33% | 0.02% |
| GO:0009740 | gibberellic acid mediated signaling<br>pathway                                              | BIOL.<br>PROC. | 1.55E-<br>02 | 1.10E-<br>03 | 1.21% | 0.39% |

|            |                                                                                                                      |                |          |          |       |       |
|------------|----------------------------------------------------------------------------------------------------------------------|----------------|----------|----------|-------|-------|
| GO:0006048 | UDP-N-acetylglucosamine biosynthetic process                                                                         | BIOL.<br>PROC. | 1.56E-02 | 1.12E-03 | 0.33% | 0.02% |
| GO:0008106 | alcohol dehydrogenase (NADP+) activity                                                                               | MOL.<br>FUNCT. | 1.56E-02 | 1.12E-03 | 0.33% | 0.02% |
| GO:0045490 | pectin catabolic process                                                                                             | BIOL.<br>PROC. | 1.57E-02 | 1.13E-03 | 1.10% | 0.33% |
| GO:0019747 | regulation of isoprenoid metabolic process                                                                           | BIOL.<br>PROC. | 1.60E-02 | 1.16E-03 | 0.44% | 0.05% |
| GO:0017148 | negative regulation of translation                                                                                   | BIOL.<br>PROC. | 1.60E-02 | 1.16E-03 | 0.44% | 0.05% |
| GO:0009344 | nitrite reductase complex [NAD(P)H]                                                                                  | CELL.<br>COMP. | 1.62E-02 | 1.18E-03 | 0.22% | 0.00% |
| GO:0031409 | pigment binding                                                                                                      | MOL.<br>FUNCT. | 1.62E-02 | 1.18E-03 | 0.22% | 0.00% |
| GO:0009496 | plastoquinol--plastocyanin reductase activity                                                                        | MOL.<br>FUNCT. | 1.62E-02 | 1.18E-03 | 0.22% | 0.00% |
| GO:0045156 | electron transporter, transferring electrons within the cyclic electron transport pathway of photosynthesis activity | MOL.<br>FUNCT. | 1.74E-02 | 1.27E-03 | 0.33% | 0.02% |
| GO:0010304 | PSII associated light-harvesting complex II catabolic process                                                        | BIOL.<br>PROC. | 1.94E-02 | 1.43E-03 | 0.55% | 0.09% |
| GO:0042132 | fructose 1,6-bisphosphate 1-phosphatase activity                                                                     | MOL.<br>FUNCT. | 2.18E-02 | 1.61E-03 | 0.33% | 0.02% |
| GO:1902066 | regulation of cell wall pectin metabolic process                                                                     | BIOL.<br>PROC. | 2.21E-02 | 1.64E-03 | 0.22% | 0.00% |
| GO:0009769 | photosynthesis, light harvesting in photosystem II                                                                   | BIOL.<br>PROC. | 2.21E-02 | 1.64E-03 | 0.22% | 0.00% |
| GO:0048487 | beta-tubulin binding                                                                                                 | MOL.<br>FUNCT. | 2.21E-02 | 1.64E-03 | 0.22% | 0.00% |
| GO:0008124 | 4-alpha-hydroxytetrahydrobiopterin dehydratase activity                                                              | MOL.<br>FUNCT. | 2.21E-02 | 1.64E-03 | 0.22% | 0.00% |

|            |                                                              |                |          |          |       |       |
|------------|--------------------------------------------------------------|----------------|----------|----------|-------|-------|
| GO:0009073 | aromatic amino acid family biosynthetic process              | BIOL.<br>PROC. | 2.37E-02 | 1.78E-03 | 1.21% | 0.41% |
| GO:0046688 | response to copper ion                                       | BIOL.<br>PROC. | 2.49E-02 | 1.87E-03 | 0.44% | 0.05% |
| GO:0051287 | NAD binding                                                  | MOL.<br>FUNCT. | 2.57E-02 | 1.93E-03 | 0.88% | 0.24% |
| GO:0016122 | xanthophyll metabolic process                                | BIOL.<br>PROC. | 2.63E-02 | 1.99E-03 | 0.44% | 0.05% |
| GO:0004332 | fructose-bisphosphate aldolase activity                      | MOL.<br>FUNCT. | 2.65E-02 | 2.00E-03 | 0.33% | 0.02% |
| GO:0009279 | cell outer membrane                                          | CELL.<br>COMP. | 2.85E-02 | 2.18E-03 | 0.22% | 0.01% |
| GO:0045252 | oxoglutarate dehydrogenase complex                           | CELL.<br>COMP. | 2.85E-02 | 2.18E-03 | 0.22% | 0.01% |
| GO:0004149 | dihydrolipoyllysine-residue succinyltransferase activity     | MOL.<br>FUNCT. | 2.85E-02 | 2.18E-03 | 0.22% | 0.01% |
| GO:0051920 | peroxiredoxin activity                                       | MOL.<br>FUNCT. | 2.89E-02 | 2.22E-03 | 0.33% | 0.03% |
| GO:0030145 | manganese ion binding                                        | MOL.<br>FUNCT. | 2.92E-02 | 2.24E-03 | 0.66% | 0.14% |
| GO:0016575 | histone deacetylation                                        | BIOL.<br>PROC. | 2.93E-02 | 2.25E-03 | 0.44% | 0.06% |
| GO:0009750 | response to fructose                                         | BIOL.<br>PROC. | 3.14E-02 | 2.44E-03 | 1.54% | 0.63% |
| GO:0048359 | mucilage metabolic process involved in seed coat development | BIOL.<br>PROC. | 3.26E-02 | 2.54E-03 | 0.44% | 0.06% |
| GO:0006066 | alcohol metabolic process                                    | BIOL.<br>PROC. | 3.45E-02 | 2.70E-03 | 1.87% | 0.84% |
| GO:0010270 | photosystem II oxygen evolving complex assembly              | BIOL.<br>PROC. | 3.54E-02 | 2.79E-03 | 0.22% | 0.01% |
| GO:0004560 | alpha-L-fucosidase activity                                  | MOL.<br>FUNCT. | 3.54E-02 | 2.79E-03 | 0.22% | 0.01% |

|            |                                                        |                |              |              |       |       |
|------------|--------------------------------------------------------|----------------|--------------|--------------|-------|-------|
| GO:0080093 | regulation of photorespiration                         | BIOL.<br>PROC. | 4.32E-<br>02 | 3.46E-<br>03 | 0.22% | 0.01% |
| GO:0031998 | regulation of fatty acid beta-oxidation                | BIOL.<br>PROC. | 4.32E-<br>02 | 3.46E-<br>03 | 0.22% | 0.01% |
| GO:0010617 | circadian regulation of calcium ion<br>oscillation     | BIOL.<br>PROC. | 4.32E-<br>02 | 3.46E-<br>03 | 0.22% | 0.01% |
| GO:0010258 | NADH dehydrogenase complex<br>(plastoquinone) assembly | BIOL.<br>PROC. | 4.32E-<br>02 | 3.46E-<br>03 | 0.22% | 0.01% |
| GO:0009517 | PSII associated light-harvesting complex<br>II         | CELL.<br>COMP. | 4.32E-<br>02 | 3.46E-<br>03 | 0.22% | 0.01% |
| GO:0004615 | phosphomannomutase activity                            | MOL.<br>FUNCT. | 4.32E-<br>02 | 3.46E-<br>03 | 0.22% | 0.01% |
| GO:0006662 | glycerol ether metabolic process                       | BIOL.<br>PROC. | 4.39E-<br>02 | 3.53E-<br>03 | 0.55% | 0.11% |

**Supplementary Table S6.** KEGG annotation of differentially expressed genes (DEGs) in *Brassica napus* that are more highly expressed in *Lm*-inoculated 74-44 BL than in inoculated Westar (scores >  $1.0 \times 10^3$ ).

| Gene ID           | Expression | log2<br>Fold<br>Change | adjusted<br>p-<br>value | Score         | KEGG pathway                                                                                                                                                       |
|-------------------|------------|------------------------|-------------------------|---------------|--------------------------------------------------------------------------------------------------------------------------------------------------------------------|
| BnaA04g0411<br>0D | 521.69     | -2.56                  | 3.25E-<br>32            | -<br>4.21E+04 | Galactose metabolism<br>Other glycan degradation<br>Glycosaminoglycan degradation<br>Sphingolipid metabolism<br>Glycosphingolipid biosynthesis -<br>ganglio series |
| BnaA03g1171<br>0D | 2828.36    | -2.03                  | 8.30E-<br>07            | -<br>3.49E+04 | Thiamine metabolism                                                                                                                                                |
| BnaAnng1475<br>0D | 2232.72    | -2.28                  | 2.74E-<br>07            | -<br>3.34E+04 | Photosynthesis                                                                                                                                                     |

|                   |         |       |          |               |                                                                                                                                                                                  |
|-------------------|---------|-------|----------|---------------|----------------------------------------------------------------------------------------------------------------------------------------------------------------------------------|
| BnaC04g30870<br>D | 4634.79 | -2.49 | 2.70E-03 | -<br>2.97E+04 | Glyoxylate and dicarboxylate metabolism<br>Carbon fixation in photosynthetic organisms                                                                                           |
| BnaA06g1771<br>0D | 1193.48 | -2.33 | 1.79E-06 | -<br>1.60E+04 | Starch and sucrose metabolism                                                                                                                                                    |
| BnaA07g2891<br>0D | 677.05  | -2.34 | 1.50E-10 | -<br>1.56E+04 | Amino sugar and nucleotide sugar metabolism                                                                                                                                      |
| BnaAnng3621<br>0D | 3591.63 | -2.71 | 3.59E-02 | -<br>1.40E+04 | Glyoxylate and dicarboxylate metabolism<br>Carbon fixation in photosynthetic organisms                                                                                           |
| BnaA03g4944<br>0D | 879.45  | -2.44 | 4.55E-07 | -<br>1.36E+04 | Taurine and hypotaurine metabolism<br>Cyanoamino acid metabolism<br>Glutathione metabolism                                                                                       |
| BnaC02g00740<br>D | 1288.39 | -2.20 | 4.95E-05 | -<br>1.22E+04 | Citrate cycle (TCA cycle)<br>Cysteine and methionine metabolism<br>Pyruvate metabolism<br>Glyoxylate and dicarboxylate metabolism<br>Carbon fixation in photosynthetic organisms |
| BnaA01g1564<br>0D | 747.11  | -3.22 | 1.63E-05 | -<br>1.15E+04 | Glycolysis / Gluconeogenesis<br>Pentose phosphate pathway<br>Fructose and mannose metabolism<br>Carbon fixation in photosynthetic organisms                                      |
| BnaA04g0857<br>0D | 1324.68 | -3.50 | 3.29E-03 | -<br>1.15E+04 | Glyoxylate and dicarboxylate metabolism<br>Carbon fixation in photosynthetic organisms                                                                                           |

|                   |         |       |              |               |                                                                                                                                                                    |
|-------------------|---------|-------|--------------|---------------|--------------------------------------------------------------------------------------------------------------------------------------------------------------------|
| BnaA05g3426<br>0D | 713.53  | -2.53 | 4.88E-<br>07 | -<br>1.14E+04 | Pyruvate metabolism<br>Carbon fixation in photosynthetic<br>organisms                                                                                              |
| BnaAnng1507<br>0D | 222.60  | -2.47 | 2.18E-<br>18 | -<br>9.72E+03 | Aminoacyl-tRNA biosynthesis                                                                                                                                        |
| BnaA09g4678<br>0D | 1218.95 | -2.55 | 8.32E-<br>04 | -<br>9.57E+03 | Glycolysis / Gluconeogenesis<br>Carbon fixation in photosynthetic<br>organisms                                                                                     |
| BnaC01g22950<br>D | 894.64  | -2.15 | 1.44E-<br>05 | -<br>9.30E+03 | Purine metabolism<br>Monobactam biosynthesis<br>Selenocompound metabolism<br>Sulfur metabolism                                                                     |
| BnaC07g41840<br>D | 823.34  | -2.19 | 1.13E-<br>05 | -<br>8.92E+03 | Taurine and hypotaurine metabolism<br>Cyanoamino acid metabolism<br>Glutathione metabolism                                                                         |
| BnaC06g31970<br>D | 628.47  | -2.57 | 3.50E-<br>06 | -<br>8.82E+03 | Amino sugar and nucleotide sugar<br>metabolism                                                                                                                     |
| BnaA08g3118<br>0D | 556.98  | -2.62 | 1.06E-<br>06 | -<br>8.70E+03 | Photosynthesis                                                                                                                                                     |
| BnaA02g3392<br>0D | 996.13  | -2.25 | 1.90E-<br>04 | -<br>8.36E+03 | Galactose metabolism<br>Other glycan degradation<br>Glycosaminoglycan degradation<br>Sphingolipid metabolism<br>Glycosphingolipid biosynthesis -<br>ganglio series |
| BnaA01g2162<br>0D | 270.07  | -2.59 | 3.29E-<br>11 | -<br>7.34E+03 | Nitrogen metabolism                                                                                                                                                |
| BnaA09g1663<br>0D | 334.12  | -2.04 | 2.54E-<br>11 | -<br>7.22E+03 | Cysteine and methionine metabolism                                                                                                                                 |
| BnaA08g1682<br>0D | 1138.74 | -2.31 | 2.30E-<br>03 | -<br>6.94E+03 | Glycolysis / Gluconeogenesis<br>Pentose phosphate pathway                                                                                                          |

|                   |         |       |          |               |                                                                                                                                                                 |
|-------------------|---------|-------|----------|---------------|-----------------------------------------------------------------------------------------------------------------------------------------------------------------|
|                   |         |       |          |               | Fructose and mannose metabolism<br>Carbon fixation in photosynthetic organisms                                                                                  |
| BnaC05g39570<br>D | 1636.46 | -2.28 | 1.45E-02 | -<br>6.87E+03 | Galactose metabolism<br>Other glycan degradation<br>Glycosaminoglycan degradation<br>Sphingolipid metabolism<br>Glycosphingolipid biosynthesis - ganglio series |
| BnaA07g3825<br>0D | 1503.31 | -2.07 | 6.23E-03 | -<br>6.85E+03 | Galactose metabolism<br>Other glycan degradation<br>Glycosaminoglycan degradation<br>Sphingolipid metabolism<br>Glycosphingolipid biosynthesis - ganglio series |
| BnaC05g09210<br>D | 1589.05 | -2.05 | 1.11E-02 | -<br>6.38E+03 | Glycolysis / Gluconeogenesis<br>Carbon fixation in photosynthetic organisms                                                                                     |
| BnaC06g17920<br>D | 570.18  | -2.51 | 5.23E-05 | -<br>6.14E+03 | Porphyrin and chlorophyll metabolism                                                                                                                            |
| BnaC02g42730<br>D | 826.28  | -2.19 | 7.08E-04 | -<br>5.71E+03 | Galactose metabolism<br>Other glycan degradation<br>Glycosaminoglycan degradation<br>Sphingolipid metabolism<br>Glycosphingolipid biosynthesis - ganglio series |
| BnaC07g14870<br>D | 718.05  | -2.01 | 1.39E-04 | -<br>5.58E+03 | Photosynthesis                                                                                                                                                  |
| BnaC08g40850<br>D | 803.37  | -2.33 | 1.10E-03 | -<br>5.54E+03 | Glycolysis / Gluconeogenesis<br>Carbon fixation in photosynthetic organisms                                                                                     |



|                   |        |       |              |               |                                                                                              |
|-------------------|--------|-------|--------------|---------------|----------------------------------------------------------------------------------------------|
| BnaA06g3274<br>0D | 461.77 | -2.67 | 3.82E-<br>05 | -<br>5.45E+03 | Glycolysis / Gluconeogenesis<br>Carbon fixation in photosynthetic<br>organisms               |
| BnaC08g19150<br>D | 598.40 | -2.25 | 1.32E-<br>04 | -<br>5.22E+03 | Photosynthesis                                                                               |
| BnaC08g23140<br>D | 158.41 | -3.18 | 5.38E-<br>11 | -<br>5.17E+03 | Porphyrin and chlorophyll<br>metabolism                                                      |
| BnaC05g24200<br>D | 656.87 | -2.41 | 1.00E-<br>03 | -<br>4.75E+03 | Carbon fixation in photosynthetic<br>organisms                                               |
| BnaC03g30230<br>D | 434.80 | -2.30 | 2.36E-<br>05 | -<br>4.63E+03 | Photosynthesis                                                                               |
| BnaC08g15120<br>D | 94.97  | -3.26 | 2.24E-<br>15 | -<br>4.53E+03 | Citrate cycle (TCA cycle)<br>Lysine degradation<br>Tryptophan metabolism                     |
| BnaC04g34390<br>D | 879.31 | -2.97 | 1.85E-<br>02 | -<br>4.53E+03 | Glyoxylate and dicarboxylate<br>metabolism<br>Carbon fixation in photosynthetic<br>organisms |
| BnaC01g18640<br>D | 805.47 | -2.13 | 2.57E-<br>03 | -<br>4.44E+03 | Pyrimidine metabolism                                                                        |
| BnaC01g27750<br>D | 361.88 | -2.28 | 4.56E-<br>06 | -<br>4.40E+03 | Nitrogen metabolism                                                                          |
| BnaC05g39340<br>D | 489.13 | -2.67 | 4.43E-<br>04 | -<br>4.38E+03 | Pentose and glucuronate<br>interconversions                                                  |
| BnaA07g3159<br>0D | 757.66 | -2.41 | 5.06E-<br>03 | -<br>4.19E+03 | Terpenoid backbone biosynthesis                                                              |
| BnaA06g2672<br>0D | 397.10 | -2.40 | 6.85E-<br>05 | -<br>3.96E+03 | Steroid biosynthesis<br>Sesquiterpenoid and triterpenoid<br>biosynthesis                     |
| BnaC08g26740<br>D | 527.49 | -2.23 | 5.34E-<br>04 | -<br>3.85E+03 | Glycolysis / Gluconeogenesis<br>Pentose phosphate pathway<br>Fructose and mannose metabolism |

|                   |        |       |          |               |                                                                                                                                                                 |
|-------------------|--------|-------|----------|---------------|-----------------------------------------------------------------------------------------------------------------------------------------------------------------|
|                   |        |       |          |               | Carbon fixation in photosynthetic organisms                                                                                                                     |
| BnaA09g5402<br>0D | 804.50 | -2.18 | 8.04E-03 | -<br>3.67E+03 | Carbon fixation in photosynthetic organisms                                                                                                                     |
| BnaA06g0494<br>0D | 191.87 | -2.17 | 3.53E-09 | -<br>3.52E+03 | Carotenoid biosynthesis                                                                                                                                         |
| BnaA03g3138<br>0D | 81.73  | -3.07 | 2.80E-13 | -<br>3.15E+03 | Amino sugar and nucleotide sugar metabolism                                                                                                                     |
| BnaA03g1329<br>0D | 233.46 | -2.69 | 1.28E-05 | -<br>3.07E+03 | Folate biosynthesis                                                                                                                                             |
| BnaC03g16100<br>D | 263.13 | -2.17 | 8.34E-06 | -<br>2.89E+03 | Folate biosynthesis                                                                                                                                             |
| BnaC03g29830<br>D | 100.77 | -2.62 | 1.17E-11 | -<br>2.89E+03 | Aminoacyl-tRNA biosynthesis                                                                                                                                     |
| BnaC04g23180<br>D | 70.33  | -2.62 | 1.39E-15 | -<br>2.74E+03 | Glycolysis / Gluconeogenesis<br>Purine metabolism<br>Pyruvate metabolism                                                                                        |
| BnaA01g0670<br>0D | 78.24  | -2.40 | 3.30E-14 | -<br>2.53E+03 | Glycerolipid metabolism<br>Glycerophospholipid metabolism<br>Phosphatidylinositol signaling system                                                              |
| BnaA01g3721<br>0D | 521.56 | -2.42 | 1.21E-02 | -<br>2.42E+03 | Galactose metabolism<br>Other glycan degradation<br>Glycosaminoglycan degradation<br>Sphingolipid metabolism<br>Glycosphingolipid biosynthesis - ganglio series |
| BnaA08g2509<br>0D | 73.22  | -2.83 | 2.83E-12 | -<br>2.39E+03 | Citrate cycle (TCA cycle)<br>Lysine degradation<br>Tryptophan metabolism                                                                                        |
| BnaC03g66720<br>D | 189.18 | -2.52 | 1.50E-05 | -<br>2.30E+03 | Pentose and glucuronate interconversions                                                                                                                        |

|                   |        |       |              |               |                                                                                                                                                |
|-------------------|--------|-------|--------------|---------------|------------------------------------------------------------------------------------------------------------------------------------------------|
| BnaA06g1949<br>0D | 289.52 | -2.14 | 2.72E-<br>04 | -<br>2.21E+03 | Glutathione metabolism                                                                                                                         |
| BnaC04g38330<br>D | 237.40 | -2.02 | 1.71E-<br>04 | -<br>1.81E+03 | Fatty acid biosynthesis<br>Fatty acid elongation                                                                                               |
| BnaC04g25260<br>D | 157.79 | -2.56 | 4.74E-<br>05 | -<br>1.75E+03 | Glycolysis / Gluconeogenesis<br>Pentose phosphate pathway<br>Fructose and mannose metabolism<br>Carbon fixation in photosynthetic<br>organisms |
| BnaC01g17000<br>D | 264.54 | -2.02 | 6.08E-<br>04 | -<br>1.72E+03 | Porphyrin and chlorophyll<br>metabolism                                                                                                        |
| BnaC03g19540<br>D | 69.09  | -2.91 | 3.97E-<br>09 | -<br>1.69E+03 | Fatty acid degradation<br>beta-Alanine metabolism<br>alpha-Linolenic acid metabolism<br>Propanoate metabolism                                  |
| BnaA01g3148<br>0D | 223.94 | -2.64 | 2.89E-<br>03 | -<br>1.50E+03 | Pentose and glucuronate<br>interconversions                                                                                                    |
| BnaC06g35410<br>D | 372.19 | -2.29 | 1.80E-<br>02 | -<br>1.49E+03 | Terpenoid backbone biosynthesis                                                                                                                |
| BnaC02g29350<br>D | 138.81 | -2.42 | 2.48E-<br>04 | -<br>1.21E+03 | Other glycan degradation<br>Sphingolipid metabolism                                                                                            |
| BnaA02g0756<br>0D | 78.38  | -2.10 | 1.04E-<br>07 | -<br>1.15E+03 | Inositol phosphate metabolism<br>Phosphatidylinositol signaling system                                                                         |
| BnaAnng1720<br>0D | 217.03 | -2.06 | 2.88E-<br>03 | -<br>1.14E+03 | Glycolysis / Gluconeogenesis<br>Pentose phosphate pathway<br>Fructose and mannose metabolism<br>Carbon fixation in photosynthetic<br>organisms |
| BnaC03g03330<br>D | 69.01  | -2.29 | 8.27E-<br>08 | -<br>1.12E+03 | Glycerolipid metabolism<br>Glycerophospholipid metabolism<br>Phosphatidylinositol signaling system                                             |

|                   |        |       |          |               |                                                                                                                                                                    |
|-------------------|--------|-------|----------|---------------|--------------------------------------------------------------------------------------------------------------------------------------------------------------------|
| BnaC01g37460<br>D | 255.98 | -2.31 | 1.34E-02 | -<br>1.11E+03 | Galactose metabolism<br>Other glycan degradation<br>Glycosaminoglycan degradation<br>Sphingolipid metabolism<br>Glycosphingolipid biosynthesis -<br>ganglio series |
| BnaA03g1700<br>0D | 48.72  | -2.95 | 2.59E-08 | -<br>1.09E+03 | Phenylpropanoid biosynthesis                                                                                                                                       |
| BnaA03g2218<br>0D | 88.24  | -2.64 | 4.21E-05 | -<br>1.02E+03 | Galactose metabolism<br>Other glycan degradation<br>Glycosaminoglycan degradation<br>Sphingolipid metabolism<br>Glycosphingolipid biosynthesis -<br>ganglio series |

**Supplementary Table S7.** Genes of *Brassica napus* that are more highly expressed in *Lm*-inoculated cotyledons of Westar than in those of 74-44 BL (scores > 2 × 10<sup>4</sup>).

| Gene Name     | Expression | log2 Fold Change | Adjusted <i>p</i> -value | Score    | InterPro ID                                                   | Description                                                                                                                               |
|---------------|------------|------------------|--------------------------|----------|---------------------------------------------------------------|-------------------------------------------------------------------------------------------------------------------------------------------|
| BnaC09g20030D | 3410.28    | 2.20             | 1.13E-28                 | 2.09E+05 | IPR006213<br>IPR006214                                        | Bax inhibitor 1, conserved site<br>Bax inhibitor 1-related                                                                                |
| BnaA04g06220D | 1236.46    | 2.82             | 6.75E-33                 | 1.12E+05 | IPR006895<br>IPR006896<br>IPR006900<br>IPR007123<br>IPR012990 | Zinc finger, Sec23/Sec24-type<br>Sec23/Sec24, trunk domain<br>Sec23/Sec24, helical domain<br>Gelsolin domain<br>Sec23/Sec24 beta-sandwich |
| BnaCnng58090D | 2353.53    | 2.39             | 2.71E-16                 | 8.75E+04 | IPR013989                                                     | Development/cell death domain.                                                                                                            |
| BnaC08g42820D | 767.75     | 4.53             | 7.76E-26                 | 8.73E+04 | IPR013126<br>IPR018181                                        | Heat shock protein 70 family<br>Heat shock protein 70, conserved site                                                                     |
| BnaAnng22050D | 1884.66    | 2.62             | 5.24E-17                 | 8.04E+04 | IPR004839                                                     | Aminotransferase, class I/classII                                                                                                         |

|               |         |      |          |          |           |                                                                      |
|---------------|---------|------|----------|----------|-----------|----------------------------------------------------------------------|
|               |         |      |          |          | IPR015421 | Pyridoxal phosphate-dependent transferase, major region, subdomain 1 |
|               |         |      |          |          | IPR015422 | Pyridoxal phosphate-dependent transferase, major region, subdomain 2 |
|               |         |      |          |          | IPR015424 | Pyridoxal phosphate-dependent transferase                            |
| BnaA08g26550D | 971.89  | 2.67 | 1.70E-31 | 8.00E+04 | IPR005225 | Small GTP-binding protein domain                                     |
|               |         |      |          |          | IPR006687 | Small GTPase superfamily, SAR1-type                                  |
|               |         |      |          |          | IPR006689 | Small GTPase superfamily, ARF/SAR type                               |
|               |         |      |          |          | IPR024156 | Small GTPase superfamily, ARF type                                   |
| BnaA06g05280D | 1986.35 | 2.35 | 2.64E-15 | 6.79E+04 | IPR005225 | Small GTP-binding protein domain                                     |
|               |         |      |          |          | IPR006687 | Small GTPase superfamily, SAR1-type                                  |
|               |         |      |          |          | IPR006689 | Small GTPase superfamily, ARF/SAR type                               |
|               |         |      |          |          | IPR024156 | Small GTPase superfamily, ARF type                                   |
| BnaA06g31440D | 866.61  | 3.55 | 1.64E-21 | 6.40E+04 | IPR003593 | AAA+ ATPase domain                                                   |
|               |         |      |          |          | IPR003959 | ATPase, AAA-type, core                                               |
|               |         |      |          |          | IPR025753 | AAA-type ATPase, N-terminal domain                                   |
| BnaC08g18340D | 954.57  | 3.24 | 1.15E-20 | 6.16E+04 | IPR001680 | WD40 repeat                                                          |
|               |         |      |          |          | IPR015943 | WD40/YVTN repeat-like-containing domain                              |
|               |         |      |          |          | IPR017986 | WD40-repeat-containing domain                                        |
|               |         |      |          |          | IPR019775 | WD40 repeat, conserved site                                          |
| BnaC06g24690D | 3099.53 | 2.28 | 1.99E-09 | 6.14E+04 | IPR003579 | Small GTPase superfamily, Rab type                                   |
|               |         |      |          |          | IPR005225 | Small GTP-binding protein domain                                     |
|               |         |      |          |          | IPR006687 | Small GTPase superfamily, SAR1-type                                  |
|               |         |      |          |          | IPR006689 | Small GTPase superfamily, ARF/SAR type                               |
|               |         |      |          |          | IPR024156 | Small GTPase superfamily, ARF type                                   |
| BnaA09g26960D | 2590.93 | 2.07 | 6.08E-11 | 5.47E+04 | IPR002208 | SecY/SEC61-alpha family                                              |
|               |         |      |          |          | IPR019561 | Translocon Sec61/SecY, plug domain                                   |
|               |         |      |          |          | IPR023201 | SecY subunit domain                                                  |
| BnaC03g44640D | 850.32  | 2.14 | 3.08E-30 | 5.37E+04 | IPR001179 | Peptidyl-prolyl cis-trans isomerase, FKBP-type, domain               |
|               |         |      |          |          | IPR011990 | Tetratricopeptide-like helical                                       |
|               |         |      |          |          | IPR013026 | Tetratricopeptide repeat-containing domain                           |

|               |         |      |          |          |           |                                                   |
|---------------|---------|------|----------|----------|-----------|---------------------------------------------------|
|               |         |      |          |          | IPR019734 | Tetratricopeptide repeat                          |
|               |         |      |          |          | IPR023566 | Peptidyl-prolyl cis-trans isomerase, FKBP-type    |
| BnaA05g20940D | 604.35  | 6.18 | 6.22E-15 | 5.31E+04 | IPR004314 | Domain of unknown function DUF239                 |
|               |         |      |          |          | IPR025521 | Domain of unknown function DUF4409                |
| BnaA07g09950D | 983.34  | 2.13 | 4.51E-26 | 5.30E+04 | IPR003579 | Small GTPase superfamily, Rab type                |
|               |         |      |          |          | IPR005225 | Small GTP-binding protein domain                  |
|               |         |      |          |          | IPR006687 | Small GTPase superfamily, SAR1-type               |
|               |         |      |          |          | IPR006689 | Small GTPase superfamily, ARF/SAR type            |
|               |         |      |          |          | IPR024156 | Small GTPase superfamily, ARF type                |
| BnaA05g16820D | 220.73  | 5.24 | 3.74E-45 | 5.14E+04 | IPR001757 | Cation-transporting P-type ATPase                 |
|               |         |      |          |          | IPR004014 | Cation-transporting P-type ATPase, N-terminal     |
|               |         |      |          |          | IPR006068 | Cation-transporting P-type ATPase, C-terminal     |
|               |         |      |          |          | IPR006408 | Calcium-transporting P-type ATPase, subfamily IIB |
|               |         |      |          |          | IPR008250 | P-type ATPase, A domain                           |
|               |         |      |          |          | IPR018303 | P-type ATPase, phosphorylation site               |
|               |         |      |          |          | IPR023214 | HAD-like domain                                   |
|               |         |      |          |          | IPR023298 | P-type ATPase, transmembrane domain               |
|               |         |      |          |          | IPR023299 | P-type ATPase, cytoplasmic domain N               |
| BnaC03g41930D | 847.71  | 2.16 | 6.09E-25 | 4.42E+04 | IPR001382 | Glycoside hydrolase, family 47                    |
| BnaCnng06680D | 1100.64 | 2.28 | 1.06E-15 | 3.75E+04 | IPR005225 | Small GTP-binding protein domain                  |
|               |         |      |          |          | IPR006687 | Small GTPase superfamily, SAR1-type               |
|               |         |      |          |          | IPR006689 | Small GTPase superfamily, ARF/SAR type            |
|               |         |      |          |          | IPR024156 | Small GTPase superfamily, ARF type                |
| BnaC03g39420D | 417.07  | 2.37 | 2.23E-37 | 3.63E+04 | IPR001680 | WD40 repeat                                       |
|               |         |      |          |          | IPR006692 | Coatomer, W                                       |
|               |         |      |          |          | IPR015943 | WD40/YVTN repeat-like-containing domain           |
|               |         |      |          |          | IPR016453 | Coatomer beta' subunit (COPB2)                    |
|               |         |      |          |          | IPR017986 | WD40-repeat-containing domain                     |
|               |         |      |          |          | IPR020472 | G-protein beta WD-40 repeat                       |
| BnaA07g34510D | 449.54  | 3.01 | 5.05E-27 | 3.56E+04 | IPR004131 | Pyrophosphate-energised proton pump               |
| BnaA09g05230D | 746.34  | 2.25 | 3.04E-19 | 3.10E+04 | IPR008429 | Cleft lip and palate transmembrane 1              |

|               |         |      |          |          |           |                                            |
|---------------|---------|------|----------|----------|-----------|--------------------------------------------|
| BnaA03g00370D | 346.01  | 3.02 | 3.74E-30 | 3.07E+04 | IPR007305 | Vesicle transport protein, Got1/SFT2-like  |
| BnaC03g07130D | 999.98  | 2.79 | 1.08E-11 | 3.06E+04 | IPR004901 | Reversibly glycosylated polypeptide family |
| BnaA01g07540D | 610.05  | 2.38 | 1.84E-18 | 2.58E+04 | IPR007599 | Derlin                                     |
| BnaC08g25990D | 545.89  | 2.91 | 8.40E-16 | 2.40E+04 | IPR003439 | ABC transporter-like                       |
|               |         |      |          |          | IPR003593 | AAA+ ATPase domain                         |
|               |         |      |          |          | IPR013525 | ABC-2 type transporter                     |
|               |         |      |          |          | IPR017871 | ABC transporter, conserved site            |
| BnaA09g32460D | 744.70  | 2.54 | 3.00E-13 | 2.37E+04 | IPR011989 | Armadillo-like helical                     |
|               |         |      |          |          | IPR013918 | Nucleotide exchange factor Fes1            |
|               |         |      |          |          | IPR016024 | Armadillo-type fold                        |
| BnaC06g41450D | 1789.63 | 2.16 | 4.69E-06 | 2.06E+04 | IPR003439 | ABC transporter-like                       |
|               |         |      |          |          | IPR003593 | AAA+ ATPase domain                         |
|               |         |      |          |          | IPR017871 | ABC transporter, conserved site            |

**Supplementary Table S8.** GO term enrichment of DEGs in *Brassica napus* that are more highly expressed in *Lm*- inoculated Westar than in inoculated 74-44 BL.

| GO ID      | GO Name                                                   | GO Category | FDR      | <i>p</i> -Value | % Test | % Reference |
|------------|-----------------------------------------------------------|-------------|----------|-----------------|--------|-------------|
| GO:0042542 | response to hydrogen peroxide                             | BIOL. PROC. | 2.31E-08 | 1.11E-11        | 4.06%  | 0.75%       |
| GO:0006457 | protein folding                                           | BIOL. PROC. | 2.31E-08 | 1.27E-11        | 5.31%  | 1.29%       |
| GO:0034976 | response to endoplasmic reticulum stress                  | BIOL. PROC. | 3.77E-08 | 2.91E-11        | 5.78%  | 1.56%       |
| GO:0009644 | response to high light intensity                          | BIOL. PROC. | 4.19E-07 | 6.00E-10        | 3.91%  | 0.84%       |
| GO:0006984 | ER-nucleus signaling pathway                              | BIOL. PROC. | 5.21E-04 | 3.16E-06        | 0.94%  | 0.06%       |
| GO:0006888 | endoplasmic reticulum to Golgi vesicle-mediated transport | BIOL. PROC. | 9.53E-04 | 6.98E-06        | 2.19%  | 0.50%       |
| GO:0006499 | N-terminal protein myristoylation                         | BIOL. PROC. | 9.53E-04 | 7.14E-06        | 2.19%  | 0.50%       |
| GO:0034605 | cellular response to heat                                 | BIOL. PROC. | 4.59E-03 | 4.29E-05        | 0.94%  | 0.09%       |

|            |                                                                         |             |          |          |        |        |
|------------|-------------------------------------------------------------------------|-------------|----------|----------|--------|--------|
| GO:0006094 | gluconeogenesis                                                         | BIOL. PROC. | 5.10E-03 | 4.94E-05 | 2.66%  | 0.84%  |
| GO:1901617 | organic hydroxy compound biosynthetic process                           | BIOL. PROC. | 5.50E-03 | 5.51E-05 | 5.00%  | 2.29%  |
| GO:0010498 | proteasomal protein catabolic process                                   | BIOL. PROC. | 1.84E-02 | 2.34E-04 | 2.97%  | 1.15%  |
| GO:0009862 | systemic acquired resistance, salicylic acid mediated signaling pathway | BIOL. PROC. | 2.81E-02 | 3.83E-04 | 2.66%  | 1.01%  |
| GO:0001561 | fatty acid alpha-oxidation                                              | BIOL. PROC. | 3.83E-02 | 5.91E-04 | 0.31%  | 0.00%  |
| GO:0071705 | nitrogen compound transport                                             | BIOL. PROC. | 4.23E-02 | 6.58E-04 | 11.72% | 7.84%  |
| GO:0005788 | endoplasmic reticulum lumen                                             | CELL. COMP. | 4.92E-10 | 1.08E-13 | 2.34%  | 0.14%  |
| GO:0009505 | plant-type cell wall                                                    | CELL. COMP. | 2.13E-05 | 5.40E-08 | 3.91%  | 1.06%  |
| GO:0005886 | plasma membrane                                                         | CELL. COMP. | 4.49E-05 | 1.24E-07 | 20.00% | 12.57% |
| GO:0030126 | COPI vesicle coat                                                       | CELL. COMP. | 6.20E-05 | 1.80E-07 | 1.09%  | 0.06%  |
| GO:0000327 | lytic vacuole within protein storage vacuole                            | CELL. COMP. | 8.68E-05 | 3.25E-07 | 0.63%  | 0.01%  |
| GO:0022626 | cytosolic ribosome                                                      | CELL. COMP. | 9.32E-03 | 9.96E-05 | 3.13%  | 1.17%  |
| GO:0005774 | vacuolar membrane                                                       | CELL. COMP. | 2.16E-02 | 2.79E-04 | 5.00%  | 2.47%  |
| GO:0009506 | plasmodesma                                                             | CELL. COMP. | 2.83E-02 | 3.95E-04 | 7.03%  | 4.04%  |
| GO:0003756 | protein disulfide isomerase activity                                    | MOL. FUNCT. | 1.82E-04 | 8.43E-07 | 1.09%  | 0.07%  |
| GO:0005198 | structural molecule activity                                            | MOL. FUNCT. | 1.20E-03 | 9.40E-06 | 5.00%  | 2.08%  |
| GO:0005524 | ATP binding                                                             | MOL. FUNCT. | 2.30E-03 | 2.05E-05 | 14.53% | 9.27%  |
| GO:0004674 | protein serine/threonine kinase activity                                | MOL. FUNCT. | 1.28E-02 | 1.48E-04 | 6.09%  | 3.15%  |
| GO:0004842 | ubiquitin-protein transferase activity                                  | MOL. FUNCT. | 1.58E-02 | 1.91E-04 | 3.28%  | 1.32%  |
| GO:0005509 | calcium ion binding                                                     | MOL. FUNCT. | 1.80E-02 | 2.26E-04 | 2.81%  | 1.05%  |
| GO:0051670 | inulinase activity                                                      | MOL. FUNCT. | 2.83E-02 | 3.96E-04 | 0.31%  | 0.00%  |
| GO:0052861 | glucan endo-1,3-beta-glucanase activity, C-3 substituted reducing group | MOL. FUNCT. | 4.85E-02 | 8.24E-04 | 0.31%  | 0.00%  |



|            |                                                                         |             |          |          |       |       |
|------------|-------------------------------------------------------------------------|-------------|----------|----------|-------|-------|
| GO:0052862 | glucan endo-1,4-beta-glucanase activity, C-3 substituted reducing group | MOL. FUNCT. | 4.85E-02 | 8.24E-04 | 0.31% | 0.00% |
| GO:0051669 | fructan beta-fructosidase activity                                      | MOL. FUNCT. | 4.85E-02 | 8.24E-04 | 0.31% | 0.00% |

**Supplementary Table S9.** KEGG annotation of differentially expressed genes (DEGs) in *Brassica napus* that are more highly expressed in *Lm*-inoculated Westar than in inoculated 74-44 BL (scores >  $1.0 \times 10^3$ ).

| Gene ID       | Expression | log2 Fold Change | adjusted <i>p</i> -value | Score    | KEGG pathway                                                                |
|---------------|------------|------------------|--------------------------|----------|-----------------------------------------------------------------------------|
| BnaA06g31440D | 866.61     | 3.55             | 1.64E-21                 | 6.40E+04 | Purine metabolism                                                           |
| BnaC03g07130D | 999.98     | 2.79             | 1.08E-11                 | 3.06E+04 | Amino sugar and nucleotide sugar metabolism                                 |
| BnaC01g40210D | 823.03     | 2.07             | 1.70E-10                 | 1.66E+04 | Glycolysis / Gluconeogenesis<br>Carbon fixation in photosynthetic organisms |
| BnaAnng05990D | 357.91     | 2.00             | 1.07E-15                 | 1.07E+04 | Oxidative phosphorylation<br>Photosynthesis                                 |
| BnaC06g00540D | 1114.69    | 2.18             | 1.73E-04                 | 9.16E+03 | Purine metabolism                                                           |
| BnaC09g40190D | 605.15     | 2.05             | 1.85E-07                 | 8.36E+03 | Purine metabolism                                                           |
| BnaC03g75900D | 254.53     | 2.06             | 2.54E-13                 | 6.60E+03 | Aminoacyl-tRNA biosynthesis                                                 |
| BnaA03g55200D | 246.72     | 2.00             | 7.34E-13                 | 6.00E+03 | Starch and sucrose metabolism                                               |

|                   |        |      |              |              |                                                                                                                                                |
|-------------------|--------|------|--------------|--------------|------------------------------------------------------------------------------------------------------------------------------------------------|
| BnaC03g7553<br>0D | 177.53 | 2.01 | 3.18E-<br>15 | 5.17E+<br>03 | Aminoacyl-tRNA biosynthesis                                                                                                                    |
| BnaC05g2114<br>0D | 96.67  | 3.21 | 1.27E-<br>15 | 4.62E+<br>03 | Fatty acid biosynthesis<br>Biotin metabolism                                                                                                   |
| BnaA09g0421<br>0D | 104.44 | 2.21 | 1.95E-<br>17 | 3.86E+<br>03 | Purine metabolism<br>Pyrimidine metabolism<br>Thiamine metabolism                                                                              |
| BnaA04g0421<br>0D | 117.64 | 2.55 | 1.68E-<br>12 | 3.53E+<br>03 | Terpenoid backbone biosynthesis                                                                                                                |
| BnaA06g2536<br>0D | 95.16  | 2.61 | 4.73E-<br>11 | 2.56E+<br>03 | Purine metabolism                                                                                                                              |
| BnaC06g2263<br>0D | 344.19 | 2.31 | 6.91E-<br>04 | 2.52E+<br>03 | Glycerolipid metabolism<br>Glycerophospholipid metabolism                                                                                      |
| BnaA04g1239<br>0D | 45.51  | 2.57 | 4.50E-<br>15 | 1.68E+<br>03 | Aminoacyl-tRNA biosynthesis                                                                                                                    |
| BnaAnng073<br>10D | 36.05  | 3.62 | 4.70E-<br>12 | 1.48E+<br>03 | Glycolysis / Gluconeogenesis<br>Pentose phosphate pathway<br>Fructose and mannose metabolism<br>Carbon fixation in photosynthetic<br>organisms |
| BnaC04g4909<br>0D | 92.73  | 2.02 | 2.14E-<br>06 | 1.06E+<br>03 | Amino sugar and nucleotide sugar<br>metabolism                                                                                                 |

**Supplementary Table S10.** Genes of *Brassica napus* that are more highly expressed in mock-inoculated cotyledons of 74-44 BL than in those of mock Westar (scores < 2 × 10<sup>4</sup>).

| Gene name     | Expression | log2 Fold Change | Adjusted <i>p</i> -value | Score     | InterPro ID | Description                             |
|---------------|------------|------------------|--------------------------|-----------|-------------|-----------------------------------------|
| BnaC08g39910D | 1652.55    | -2.16            | 1.71E-16                 | -5.62E+04 | IPR004938   | Xyloglucan fucosyltransferase           |
| BnaA09g48570D | 1148.55    | -2.16            | 3.51E-16                 | -3.83E+04 | IPR000008   | C2 calcium-dependent membrane targeting |
| BnaA09g48570D | 1148.55    | -2.16            | 3.51E-16                 | -3.83E+04 | IPR008973   | C2 calcium/lipid-binding domain, CaLB   |
| BnaA05g22060D | 290.14     | -2.10            | 3.25E-42                 | -2.53E+04 | IPR001680   | WD40 repeat                             |

|               |        |       |          |           |           |                                                   |
|---------------|--------|-------|----------|-----------|-----------|---------------------------------------------------|
| BnaA05g22060D | 290.14 | -2.10 | 3.25E-42 | -2.53E+04 | IPR015943 | WD40/YVTN repeat-like-containing domain           |
| BnaA05g22060D | 290.14 | -2.10 | 3.25E-42 | -2.53E+04 | IPR017986 | WD40-repeat-containing domain                     |
| BnaA05g22060D | 290.14 | -2.10 | 3.25E-42 | -2.53E+04 | IPR019775 | WD40 repeat, conserved site                       |
| BnaA05g22060D | 290.14 | -2.10 | 3.25E-42 | -2.53E+04 | IPR020472 | G-protein beta WD-40 repeat                       |
| BnaC09g37530D | 904.93 | -2.40 | 2.33E-08 | -1.65E+04 | IPR008811 | Raffinose synthase                                |
| BnaC09g37530D | 904.93 | -2.40 | 2.33E-08 | -1.65E+04 | IPR013785 | Aldolase-type TIM barrel                          |
| BnaC09g37530D | 904.93 | -2.40 | 2.33E-08 | -1.65E+04 | IPR017853 | Glycoside hydrolase, superfamily                  |
| BnaA09g05080D | 642.03 | -2.34 | 6.08E-11 | -1.54E+04 | IPR000008 | C2 calcium-dependent membrane targeting           |
| BnaA09g05080D | 642.03 | -2.34 | 6.08E-11 | -1.54E+04 | IPR008973 | C2 calcium/lipid-binding domain, CaLB             |
| BnaA09g05080D | 642.03 | -2.34 | 6.08E-11 | -1.54E+04 | IPR018029 | C2 membrane targeting protein                     |
| BnaC03g03670D | 286.50 | -2.51 | 5.41E-19 | -1.31E+04 | IPR001680 | WD40 repeat                                       |
| BnaC03g03670D | 286.50 | -2.51 | 5.41E-19 | -1.31E+04 | IPR006594 | LisH dimerisation motif                           |
| BnaC03g03670D | 286.50 | -2.51 | 5.41E-19 | -1.31E+04 | IPR006595 | CTLH, C-terminal LisH motif                       |
| BnaC03g03670D | 286.50 | -2.51 | 5.41E-19 | -1.31E+04 | IPR015943 | WD40/YVTN repeat-like-containing domain           |
| BnaC03g03670D | 286.50 | -2.51 | 5.41E-19 | -1.31E+04 | IPR017986 | WD40-repeat-containing domain                     |
| BnaC03g03670D | 286.50 | -2.51 | 5.41E-19 | -1.31E+04 | IPR019775 | WD40 repeat, conserved site                       |
| BnaC03g03670D | 286.50 | -2.51 | 5.41E-19 | -1.31E+04 | IPR020472 | G-protein beta WD-40 repeat                       |
| BnaA06g01730D | 909.50 | -2.90 | 2.36E-05 | -1.22E+04 | IPR024286 | Domain of unknown function DUF3700                |
| BnaA01g28810D | 244.27 | -3.56 | 2.28E-12 | -1.01E+04 | IPR001220 | Legume lectin domain                              |
| BnaA01g28810D | 244.27 | -3.56 | 2.28E-12 | -1.01E+04 | IPR008985 | Concanavalin A-like lectin/glucanases superfamily |
| BnaA01g28810D | 244.27 | -3.56 | 2.28E-12 | -1.01E+04 | IPR013320 | Concanavalin A-like lectin/glucanase, subgroup    |
| BnaA01g28810D | 244.27 | -3.56 | 2.28E-12 | -1.01E+04 | IPR016363 | Lectin                                            |

**Supplementary Table S11.** GO term enrichment of DEGs in *Brassica napus* that are more highly expressed in mock-inoculated 74-44 BL than in mock Westar.

| GO ID      | GO Name                            | GO Category | FDR      | P-Value  | % Test | % Reference |
|------------|------------------------------------|-------------|----------|----------|--------|-------------|
| GO:0004402 | histone acetyltransferase activity | MOL. FUNCT. | 1.42E-01 | 9.69E-04 | 1.41%  | 0.09%       |

**Supplementary Table S12.** KEGG annotation of differentially expressed genes (DEGs) in *Brassica napus* that are more highly expressed in mock-inoculated 74-44 BL than in mock-inoculated Westar (scores > 1.0 × 10<sup>3</sup>).

| Gene ID       | Expression | log2 Fold Change | adjusted p-value | Score     | KEGG_pathway                                     |
|---------------|------------|------------------|------------------|-----------|--------------------------------------------------|
| BnaAnng15770D | 72.68      | -4.42            | 3.71E-25         | -7.84E+03 | Fructose and mannose metabolism                  |
| BnaC03g02050D | 204.28     | -2.28            | 2.04E-13         | -5.90E+03 | Starch and sucrose metabolism                    |
| BnaA09g51530D | 19.32      | -7.62            | 5.19E-13         | -1.81E+03 | Fatty acid biosynthesis<br>Fatty acid elongation |

**Supplementary Table S13.** Genes of *Brassica napus* that are more highly expressed in mock-inoculated cotyledons of Westar than in those of 74-44 BL (scores > 8.6 × 10<sup>3</sup>).

| Gene name     | Expression | log2 Fold Change | adjusted p-value | Score    | InterPro ID | Description                                                           |
|---------------|------------|------------------|------------------|----------|-------------|-----------------------------------------------------------------------|
| BnaA03g55320D | 1683.64    | 3.48             | 2.20E-20         | 1.15E+05 | IPR004864   | Late embryogenesis abundant protein, LEA-14                           |
| BnaC05g14950D | 13184.04   | 2.09             | 1.21E-02         | 5.28E+04 | IPR001938   | Thaumatococcal protein                                                |
| BnaA09g14680D | 796.92     | 2.20             | 3.59E-24         | 4.11E+04 | IPR000767   | Disease resistance protein                                            |
| BnaA09g14680D | 796.92     | 2.20             | 3.59E-24         | 4.11E+04 | IPR002182   | NB-ARC                                                                |
| BnaC08g41540D | 623.42     | 2.37             | 7.65E-20         | 2.83E+04 | IPR000960   | Flavin monooxygenase FMO                                              |
| BnaC08g41540D | 623.42     | 2.37             | 7.65E-20         | 2.83E+04 | IPR020946   | Flavin monooxygenase-like                                             |
| BnaC03g59870D | 160.11     | 5.25             | 2.16E-19         | 1.57E+04 | IPR000719   | Protein kinase, catalytic domain                                      |
| BnaC03g59870D | 160.11     | 5.25             | 2.16E-19         | 1.57E+04 | IPR001245   | Serine-threonine/tyrosine-protein kinase catalytic domain             |
| BnaC03g59870D | 160.11     | 5.25             | 2.16E-19         | 1.57E+04 | IPR001611   | Leucine-rich repeat                                                   |
| BnaC03g59870D | 160.11     | 5.25             | 2.16E-19         | 1.57E+04 | IPR002290   | Serine/threonine- / dual specificity protein kinase, catalytic domain |
| BnaC03g59870D | 160.11     | 5.25             | 2.16E-19         | 1.57E+04 | IPR008271   | Serine/threonine-protein kinase, active site                          |
| BnaC03g59870D | 160.11     | 5.25             | 2.16E-19         | 1.57E+04 | IPR011009   | Protein kinase-like domain                                            |
| BnaC03g59870D | 160.11     | 5.25             | 2.16E-19         | 1.57E+04 | IPR013320   | Concanavalin A-like lectin/glucanase, subgroup                        |
| BnaC03g59870D | 160.11     | 5.25             | 2.16E-19         | 1.57E+04 | IPR017441   | Protein kinase, ATP binding site                                      |
| BnaC03g59870D | 160.11     | 5.25             | 2.16E-19         | 1.57E+04 | IPR020635   | Tyrosine-protein kinase, catalytic domain                             |
| BnaC03g59870D | 160.11     | 5.25             | 2.16E-19         | 1.57E+04 | IPR024788   | Malectin-like carbohydrate-binding domain                             |
| BnaA03g32960D | 1854.73    | 2.09             | 8.96E-05         | 1.57E+04 | IPR003114   | Phox-associated domain                                                |
| BnaA03g32960D | 1854.73    | 2.09             | 8.96E-05         | 1.57E+04 | IPR013937   | Sorting nexin, C-terminal                                             |
| BnaA03g32960D | 1854.73    | 2.09             | 8.96E-05         | 1.57E+04 | IPR013996   | PX-associated, sorting nexin 13                                       |
| BnaA05g33670D | 404.63     | 2.59             | 5.25E-11         | 1.08E+04 | IPR013057   | Amino acid transporter, transmembrane                                 |

|               |         |      |          |          |           |                                   |
|---------------|---------|------|----------|----------|-----------|-----------------------------------|
| BnaC09g50120D | 224.00  | 2.46 | 5.03E-17 | 8.99E+03 | IPR004147 | UbiB domain                       |
| BnaC09g50120D | 224.00  | 2.46 | 5.03E-17 | 8.99E+03 | IPR011009 | Protein kinase-like domain        |
| BnaCnng49630D | 2783.81 | 2.23 | 3.98E-02 | 8.68E+03 | IPR001128 | Cytochrome P450                   |
| BnaCnng49630D | 2783.81 | 2.23 | 3.98E-02 | 8.68E+03 | IPR002401 | Cytochrome P450, E-class, group I |
| BnaCnng49630D | 2783.81 | 2.23 | 3.98E-02 | 8.68E+03 | IPR017972 | Cytochrome P450, conserved site   |

**Supplementary Table S14.** GO term enrichment of DEGs in *Brassica napus* that are more highly expressed in mock-inoculated Westar than in mock 74-44 BL.

| GO ID      | GO Name                | GO Category | FDR      | <i>p</i> -Value | % Test | % Reference |
|------------|------------------------|-------------|----------|-----------------|--------|-------------|
| GO:0043531 | ADP binding            | MOL. FUNCT. | 8.84E-03 | 4.22E-05        | 3.68%  | 0.74%       |
| GO:0004497 | monooxygenase activity | MOL. FUNCT. | 2.22E-02 | 2.12E-04        | 3.31%  | 0.74%       |

**Supplementary Table S15.** KEGG annotation of differentially expressed genes (DEGs) in *Brassica napus* that are more highly expressed in mock-inoculated Westar than in mock 74-44 BL (scores >1.0 x 10<sup>3</sup>).

| Gene ID       | Expression | log <sub>2</sub> Fold Change | Adjusted <i>p</i> -value | Score    | KEGG_Pathway                                             |
|---------------|------------|------------------------------|--------------------------|----------|----------------------------------------------------------|
| BnaCnng45230D | 320.11     | 3.50                         | 2.14E-04                 | 4.11E+03 | Nitrogen metabolism                                      |
| BnaC09g48850D | 353.63     | 2.53                         | 1.35E-03                 | 2.57E+03 | Phenylpropanoid biosynthesis                             |
| BnaA03g36540D | 238.98     | 2.24                         | 2.53E-05                 | 2.46E+03 | Glycerophospholipid metabolism<br>Ether lipid metabolism |
